# Supplementary material for: The bovine milk proteome: cherishing, nourishing and fostering molecular complexity. An interactomics and functional overview
Source: Royal Society of Chemistry journal article supplement (doi:10.1039/c0mb00027b), 2010-09-29
Supplement: c0mb00027b_1.pdf [file c0mb00027b_1.pdf]

## Supplementary Table 1 - Proteins from Bovine Milk

Symbol, identification number, name, localization and tentative physiological function are reported. Abbreviations: A, angiogenesis and blood functionality; B, bone maturation; C, cytoplasm; D, cell differentiation; ER, endoplasmic reticulum; ES, extracellular space; G, cell growth/tissue development; GA, Golgi-associated; I, defence/immunity; L, lipid droplet transport/secretion; LY, lysosome; M, gastrointestinal tract maturation; MF, milk fat globule membrane; N, nutrient delivery; NU, nucleus; O, other; P, protein degradation; PM, plasma membrane; S, structure; ST, signal transduction; T, transport; U, unknown; V, nervous system maturation; W, whey; Z, inflammation. Asterisks indicate proteins known resisting against gastrointestinal digestion. Circles indicate proteins identified as human or mouse homologues.

| N.  | Symbol                          | Uniprot ID | Name                                                                                   | Reference             | Site | Role/Function | Fraction |
|-----|---------------------------------|------------|----------------------------------------------------------------------------------------|-----------------------|------|---------------|----------|
| 1.  | A1BG                            | Q2KJF1     | Alpha-1-B glycoprotein                                                                 | 2, 5, 10, 12          | ES   | I             | W        |
| 2.  | A2M                             | Q7SIH1     | Alpha-2-macroglobulin                                                                  | 2, 10                 | ES   | A, I, P       | W        |
| 3.  | A5D7Q2                          | A5D7Q2     | Putative uncharacterized protein                                                       | 2                     | U    | U             | W        |
| 4.  | ABCG2                           | Q4GZT4     | ATP-binding cassette sub-family G member 2, breast cancer resistance protein           | 1, 2, 10              | PM   | A             | MF, W    |
| 5.  | ABTB2                           | Q8N961     | Ankyrin repeat and BTB/POZ domain-containing protein 2                                 | 10                    | U    | U             | MF       |
| 6.  | ACACA                           | Q9TTS3     | Acetyl-Coenzyme A carboxylase 1                                                        | 1, 10, 12, 13         | C    | L             | MF       |
| 7.  | ACBD3                           | A4FUI0     | ACBD3, Golgi resident protein GCP60                                                    | 10                    | GA   | G, L, ST, V   | W        |
| 8.  | ACO1                            | Q0VCU1     | Aconitase 1                                                                            | 2, 10                 | C    | O             | MF, W    |
| 9.  | ACPI                            | P11064     | Low molecular weight phosphotyrosine protein phosphatase                               | 13                    | C    | B, I, ST, Z   | MF       |
| 10. | ACSBG1                          | Q2KHW5     | Long-chain-fatty-acid-CoA ligase ACSBG1, acyl-CoA synthetase bubblegum family member 1 | 10                    | C    | L             | MF       |
| 11. | ACSL1                           | Q0VCZ8     | Acyl-CoA synthetase long-chain family member 1                                         | 1, 10, 12             | C    | L             | MF       |
| 12. | ACTA1                           | P68138     | Actin alpha 1 (skeletal muscle)                                                        | 12                    | C    | L, S          | W        |
| 13. | ACTB                            | P60712     | Actin beta (cytoplasmic)                                                               | 3, 4, 6, 7, 9, 10, 12 | C    | L, S          | MF, W    |
| 14. | ACTC1                           | Q3ZC07     | Actin alpha 1 (cardiac muscle)                                                         | 10                    | C    | L, S          | W        |
| 15. | ACTG1                           | P63258     | Actin gamma 1                                                                          | 2, 10                 | C    | L, S          | W        |
| 16. | ACTR3                           | P61157     | Actin-related protein 3, ARP3                                                          | 3, 12                 | C    | L, S          | MF       |
| 17. | ADAM1                           | O77779     | Fertilin alpha                                                                         | 10                    | U    | O             | W        |
| 18. | ADCY5°                          | O95622     | Adenylate cyclase type 5                                                               | 10                    | PM   | ST            | W        |
| 19. | AHSG                            | P12763     | Alpha-2-HS-glycoprotein, fetuin A                                                      | 3, 5, 8, 9, 10, 12    | ES   | B, D, M, Z    | MF, W    |
| 20. | AKR1A1                          | Q3ZCJ2     | Alcohol dehydrogenase (NADP <sup>+</sup> )                                             | 6                     | C    | N             | MF       |
| 21. | ALB                             | P02769     | Albumin                                                                                | 2, 5, 6, 8, 9, 10     | ES   | L, N, T       | MF, W    |
| 22. | ALDH2                           | P20000     | Aldehyde dehydrogenase 2 family (mitochondrial)                                        | 3, 12                 | C    | O             | MF       |
| 23. | ALDOB                           | Q3T0S5     | Fructose-bisphosphate aldolase B                                                       | 13                    | C    | O             | MF       |
| 24. | ALPI                            | P19111     | Intestinal-type alkaline phosphatase                                                   | 10, 13                | PM   | B, I          | W, MF    |
| 25. | ALPL                            | P09487     | Alkaline phosphatase, tissue-nonspecific isozyme                                       | 10                    | PM   | B             | W        |
| 26. | AMBP                            | P00978     | Alpha-1-microglobulin, protein AMBP, trypstatin                                        | 12                    | ES   | I, P, ST, Z   | W        |
| 27. | AMY2A*                          | Q3MHH8     | Amylase alpha 2A                                                                       | 40                    | ES   | N             | W        |
| 28. | ANG1                            | P10152     | Angiogenin, RNase A family member 5                                                    | 2, 5, 10, 12, 13      | ES   | A, I          | MF, W    |
| 29. | ANK3                            | A7Z090     | Ankyrin 3, node of Ranvier ankyrin G                                                   | 3                     | PM   | ST, V         | MF       |
| 30. | ANKRA2                          | Q2K179     | Ankyrin repeat family A protein 2                                                      | 4                     | C    | L             | MF       |
| 31. | ANKRD16                         | Q0P597     | Ankyrin repeat domain 16D                                                              | 10                    | C    | L             | W        |
| 32. | ANKRD22                         | A2VDV1     | Ankyrin repeat domain 22                                                               | 1                     | C    | L             | MF       |
| 33. | ANXA1                           | P46193     | Annexin A1                                                                             | 3, 4, 10, 12          | PM   | L             | MF       |
| 34. | ANXA2                           | P04272     | Annexin A2                                                                             | 3, 4, 6, 12           | PM   | A, L, P       | MF       |
| 35. | ANXA3                           | Q3SWX7     | Annexin A3                                                                             | 7                     | C    | L, N          | MF       |
| 36. | ANXA5                           | P81287     | Annexin A5                                                                             | 2, 4, 7, 9, 10        | PM   | A, L, N       | MF, W    |
| 37. | APOA1                           | P15497     | Apolipoprotein A-I                                                                     | 1, 2, 3, 8, 9, 10, 12 | ES   | L, N          | MF, W    |
| 38. | APOA2                           | P81644     | Apolipoprotein A-II                                                                    | 8, 10                 | ES   | I, L, N       | MF       |
| 39. | APOA4                           | Q32PJ2     | Apolipoprotein A-IV                                                                    | 2, 4, 10              | ES   | L, N          | W        |
| 40. | APOB°                           | P04114     | Apolipoprotein B                                                                       | 3                     | ES   | I, L, N       | MF       |
| 41. | APOC3                           | P19035     | Apolipoprotein C-III                                                                   | 8, 10                 | ES   | G, L, N, ST   | W        |
| 42. | APOE                            | Q03247     | Apolipoprotein E                                                                       | 1, 2, 4, 10, 12       | ES   | L, N          | MF       |
| 43. | APOH                            | P17690     | Beta-2-glycoprotein 1, apolipoprotein H                                                | 9, 10, 12             | ES   | L, Z          | MF, W    |
| 44. | AQPEP°                          | Q6Q4G3     | Aminopeptidase Q, laeverin                                                             | 10                    | PM   | P, T          | W        |
| 45. | ARF1                            | P84080     | ADP-ribosylation factor 1                                                              | 1, 6, 7, 12           | C    | L, ST, T      | MF       |
| 46. | ARF4                            | Q3SZF2     | ADP-ribosylation factor 4                                                              | 7, 10                 | C    | L, ST, T      | MF       |
| 47. | ARHGDI A                        | P19803     | Rho GDP dissociation inhibitor 1                                                       | 1, 10, 12             | C    | ST            | MF       |
| 48. | ARHGFE F4                       | Q9NR80     | Rho guanine nucleotide exchange factor 4                                               | 10                    | PM   | ST            | W        |
| 49. | ARL15                           | Q5EA19     | ADP-ribosylation factor-like protein 15                                                | 1                     | U    | G, ST         | MF       |
| 50. | ATAD2°                          | Q6PL18     | ATPase family AAA domain-containing protein 2, ANCCA                                   | 13                    | C    | B, G          | MF       |
| 51. | ATP13A3°<br>(includes EG:79572) | Q9H7F0     | Cation transporting ATPase type 13A3                                                   | 1                     | U    | N, T          | MF       |

|      |          |        |                                                                                |                                 |    |               |       |
|------|----------|--------|--------------------------------------------------------------------------------|---------------------------------|----|---------------|-------|
| 52.  | ATP13A4° | Q8N1Q9 | Cation transporting ATPase type 13A4                                           | 1, 10                           | PM | N, T          | MF    |
| 53.  | ATP13A5° | Q8BUP1 | Cation transporting ATPase type 13A5                                           | 1                               | PM | N, T          | MF    |
| 54.  | ATP2B2   | Q95ML6 | Calcium transporting ATPase, plasma membrane                                   | 1                               | PM | N, T          | MF    |
| 55.  | ATP5A1   | P19483 | Proton transporting ATP synthase subunit alpha (mitochondrial, cardiac muscle) | 3, 12                           | C  | G, M, N, O, T | MF    |
| 56.  | ATP5F1   | P13619 | Proton transporting ATP synthase subunit beta (mitochondrial)                  | 12                              | C  | N, O, T       | MF    |
| 57.  | ATP6AP1  | P40682 | V-type proton ATP synthase subunit S1                                          | 10                              | C  | B             | W     |
| 58.  | ATP6AP2  | P81134 | Proton transporting ATP synthase lysosomal accessory protein 2, renin receptor | 2                               | C  | L, ST         | W     |
| 59.  | ATXN2L°  | Q8WWM7 | Ataxin 2-like protein                                                          | 10                              | PM | ST, V         | W     |
| 60.  | ATXN7°   | O15265 | Ataxin 7                                                                       | 10                              | N  | G, V          | MF    |
| 61.  | AUP1     | Q3ZC65 | Ancient ubiquitous protein 1                                                   | 10                              | U  | N, O          | MF    |
| 62.  | AZGP1    | Q3ZCH5 | Zinc-alpha-2-glycoprotein                                                      | 2, 5, 10, 12                    | ES | G, L, ST      | W     |
| 63.  | B2M      | P01888 | Beta-2-microglobulin, lactollin                                                | 2, 3, 4, 8, 10, 12              | PM | I             | MF, W |
| 64.  | B4GALT1  | P08037 | Beta 1,4-galactosyltransferase 1, Beta-1,4-GalTase 1                           | 2, 9                            | C  | N             | MF, W |
| 65.  | BCHE     | P32749 | Cholinesterase                                                                 | 13                              | C  | N, V          | MF    |
| 66.  | BRCA1    | Q864U1 | Breast cancer type 1 susceptibility protein                                    | 11                              | N  | G, N, O       | MF    |
| 67.  | BRCA2    | Q2NL37 | Breast cancer type 2 susceptibility protein, CDKN1A-interacting protein        | 11                              | N  | G, O          | MF    |
| 68.  | BSG      | Q865R3 | Basigin                                                                        | 4, 10                           | PM | G, N, V       | MF    |
| 69.  | BTBD9    | A4IFG2 | BTB/POZ domain-containing protein 9                                            | 10                              | PM | O             | W     |
| 70.  | BTC      | A2VE27 | Betacellulin                                                                   | 22                              | ES | D, G          | U     |
| 71.  | BTD      | A6QQ07 | Biotinidase                                                                    | 34                              | ES | N             | U     |
| 72.  | BTN1A1   | P18892 | Butyrophilin subfamily 1 member A1                                             | 1, 2, 3, 5, 6, 7, 9, 10, 11, 13 | PM | L             | MF, W |
| 73.  | C3       | Q2UVX4 | Complement component 3                                                         | 2, 4, 5, 8, 10, 12              | ES | I             | MF, W |
| 74.  | C4A      | P01030 | Complement component 4A                                                        | 2, 8, 12                        | ES | I             | W     |
| 75.  | C4BPA    | A5D9D2 | Complement component 4 binding protein, alpha chain                            | 2                               | ES | I             | W     |
| 76.  | C5       | P12082 | Complement component 5a, anaphylatoxin                                         | 20, 26                          | ES | I             | W     |
| 77.  | C7       | Q29RQ1 | Complement component 7                                                         | 2, 5, 12                        | ES | I             | MF, W |
| 78.  | C8B°     | P07358 | Complement component 8 beta chain                                              | 12                              | ES | I             | W     |
| 79.  | C9       | Q3MHN2 | Complement component 9                                                         | 2, 5, 12                        | ES | I             | W     |
| 80.  | CA2      | P00921 | Carbonic anhydrase II                                                          | 7                               | C  | D, G, L, T    | MF    |
| 81.  | CA6*     | P18915 | Carbonic anhydrase VI                                                          | 33                              | ES | G, D          | U     |
| 82.  | CALCA    | P01260 | Calcitonin                                                                     | 15                              | ES | B, G, ST      | U     |
| 83.  | CAMP     | P49913 | Cathelicidin antimicrobial peptide                                             | 3, 10                           | C  | I             | MF    |
| 84.  | CANT1°   | Q8WVQ1 | Calcium-activated nucleotidase 1, thiamine pyrophosphatase                     | 13                              | C  | I, ST         | MF    |
| 85.  | CANX     | Q8HYW3 | Calnexin                                                                       | 1, 4                            | C  | I, N, T       | MF    |
| 86.  | CAPN6°   | Q9Y6Q1 | Calpain 6                                                                      | 4                               | C  | P, S          | MF    |
| 87.  | CAPZA1   | A4FUA8 | F-actin-capping protein subunit alpha 1                                        | 3                               | C  | S             | MF    |
| 88.  | CASP1    | A0PCH9 | Caspase 1, apoptosis-related cysteine peptidase, interleukin 1beta convertase  | 10                              | C  | I, P, Z       | W     |
| 89.  | CAT      | P00432 | Catalase                                                                       | 3, 13                           | C  | G, I, O       | MF    |
| 90.  | CATHL1   | P22226 | Cathelicidin 1, bactenecin 1, cyclic dodecapeptide                             | 2, 3, 8, 9, 10, 12              | ES | I             | MF, W |
| 91.  | CATHL2   | P19660 | Cathelicidin 2, bactenecin 5                                                   | 2, 8                            | ES | I             | W     |
| 92.  | CATHL3   | P19661 | Cathelicidin 3, bactenecin 7                                                   | 8                               | ES | I             | W     |
| 93.  | CATHL4   | P33046 | Cathelicidin 4, indolicidin                                                    | 8                               | ES | I             | W     |
| 94.  | CAV1     | P79132 | Caveolin 1, caveolae protein 22 kDa                                            | 11                              | PM | G, I, ST      | MF    |
| 95.  | CD109°   | Q6YHK3 | CD109 antigen                                                                  | 10                              | PM | D, G, I       | W     |
| 96.  | CD14     | Q95122 | CD14 molecule                                                                  | 1, 2, 4, 5, 6, 9, 10, 12, 26    | PM | I, L          | MF, W |
| 97.  | CD36     | P26201 | CD36 molecule, platelet glycoprotein IV, thrombospondin receptor               | 1, 2, 3, 4, 9, 10, 11, 13       | PM | I, L, Z       | MF, W |
| 98.  | CD44     | Q29423 | CD44 antigen                                                                   | 36                              | PM | G, I, ST      | U     |
| 99.  | CD46     | Q6VE48 | CD46, membrane cofactor protein, MCP                                           | 10                              | PM | I, L          | MF    |
| 100. | CD5      | P19238 | CD5 molecule                                                                   | 5                               | PM | I             | MF, W |
| 101. | CD5L     | A6QNW7 | CD5 molecule-like                                                              | 2, 10, 12                       | PM | I             | W     |
| 102. | CD79A    | P40293 | B-cell antigen receptor complex-associated protein alpha chain (IgA)           | 3, 4, 10                        | PM | I             | MF    |
| 103. | CD81     | Q3ZCD0 | CD81 antigen                                                                   | 4, 10                           | PM | G, I          | MF, W |
| 104. | CD82     | A5D7E6 | CD82                                                                           | 4                               | PM | G, I, ST      | MF    |
| 105. | CD9      | P30932 | CD9 antigen                                                                    | 1, 4, 10, 12                    | PM | I, Z          | MF    |
| 106. | CDC42    | B6VAP7 | Cell division control protein 42 homolog                                       | 4, 10                           | C  | G, ST, V      | MF, W |
| 107. | CDC7A    | Q32PH1 | Cell division cycle-associated protein 7                                       | 10                              | N  | G, I          | W     |
| 108. | CFB      | P81187 | Complement factor B                                                            | 2, 10                           | ES | I             | W     |
| 109. | CFD      | Q3T0A3 | Complement factor D, C3 convertase activator, properdin factor D               | 5, 10, 12                       | ES | I             | W     |
| 110. | CFH      | Q28085 | Complement factor H                                                            | 2                               | ES | I             | W     |
| 111. | CFI      | Q32PI4 | Complement factor I                                                            | 10, 12                          | ES | I             | W     |
| 112. | CFL1     | Q5E9F7 | Cofilin-1                                                                      | 1                               | C  | S, ST         | MF    |
| 113. | CHI3L1   | P30922 | Chitinase 3-like protein 1, cartilage glycoprotein 39                          | 2                               | ES | B, D, I, ST   | W     |
| 114. | CHI3L2   | Q15782 | Chitinase-3-like protein 2, chondrocyte protein 39                             | 5                               | C  | B, D, I, ST   | W     |
| 115. | CHP      | Q3SYS6 | Calcium-binding protein p22                                                    | 1, 6, 7                         | C  | L, N, ST      | MF    |

|      |                            |        |                                                                                                                    |                    |    |                |       |
|------|----------------------------|--------|--------------------------------------------------------------------------------------------------------------------|--------------------|----|----------------|-------|
| 116. | CIB1                       | Q17QE5 | Calcium and integrin-binding protein 1                                                                             | 10                 | PM | G, I, Z        | W     |
| 117. | CIDEA                      | A4FUX1 | Cell death-inducing DFFA-like effector A                                                                           | 1, 10              | C  | G, I, L, N     | MF    |
| 118. | CL43                       | P42916 | Collectin 43                                                                                                       | 10                 | ES | I              | W     |
| 119. | CLEC3B                     | P05452 | Tetranectin, C-type lectin domain family 3 member B                                                                | 5, 10, 12          | ES | B, G, I        | MF, W |
| 120. | CLIC4                      | Q9XSA7 | Chloride intracellular channel protein 4                                                                           | 4                  | PM | O, T           | MF    |
| 121. | CLP1                       | A2VE01 | Polynucleotide kinase Clp1, polyribonucleotide 5'-hydroxyl-kinase Clp1, chitinase-like protein 2                   | 3, 12              | N  | O              | MF    |
| 122. | CLTC                       | P49951 | Clathrin heavy chain 1                                                                                             | 10                 | M  | L              | W     |
| 123. | CLU                        | P17697 | Clusterin, apolipoprotein J                                                                                        | 2, 4, 9, 10, 12    | ES | I, L           | W     |
| 124. | CNTFR                      | O18962 | Ciliary neurotrophic factor receptor                                                                               | 10                 | PM | G, V           | W     |
| 125. | COL11A1                    | Q28083 | Collagen alpha-1(XI) chain                                                                                         | 10                 | ES | B, D           | MF    |
| 126. | CORO1A                     | Q92176 | Coronin, actin binding protein 1A                                                                                  | 3                  | C  | D, G, I, L     | MF    |
| 127. | CP                         | Q32P72 | Ceruloplasmin, ferroxidase                                                                                         | 2                  | ES | N              | W     |
| 128. | CPB2                       | Q2KIG3 | Carboxypeptidase B2                                                                                                | 2                  | ES | P              | W     |
| 129. | CREG1                      | Q148D9 | Cellular repressor of E1A-stimulated genes 1                                                                       | 2, 5, 10, 12       | N  | D, G           | W     |
| 130. | CRISP2                     | Q32LP8 | Cysteine-rich secretory protein 2                                                                                  | 5, 12              | ES | O              | W     |
| 131. | CRISP3 (includes EG:10321) | Q3ZCL0 | Cysteine-rich secretory protein 3                                                                                  | 2, 10              | ES | I              | W     |
| 132. | CSF2, GM-CSF               | P11052 | Granulocyte-monocyte colony-stimulating factor, GM-CSF                                                             | 29                 | ES | D, G           | U     |
| 133. | CSF3                       | P35833 | Granulocyte colony-stimulating factor, G-CSF                                                                       | 10, 29             | ES | D, G, I, ST    | W     |
| 134. | CSN1S1 (includes EG:1446)  | P02662 | Casein alpha S1                                                                                                    | 2, 5, 8, 9, 10, 12 | ES | B, I, N        | MF, W |
| 135. | CSN1S2                     | P02663 | Casein alpha S2                                                                                                    | 4, 5, 9, 10        | ES | B, I, N        | MF    |
| 136. | CSN2                       | P02666 | Casein beta                                                                                                        | 1, 5, 8, 10        | ES | B, I, N        | MF, W |
| 137. | CSN3*                      | P02668 | Casein kappa                                                                                                       | 1, 2, 5, 8, 9, 10  | ES | B, I, N        | MF, W |
| 138. | CSNK1A1                    | Q32L14 | Casein kinase 1 alpha 1                                                                                            | 3                  | C  | ST             | W     |
| 139. | CST3                       | P01035 | Cystatin C                                                                                                         | 35                 | ES | P              | U     |
| 140. | CTSB                       | P07688 | Cathepsin B                                                                                                        | 2                  | C  | P              | W     |
| 141. | CTSD                       | P80209 | Cathepsin D                                                                                                        | 2                  | C  | P              | W     |
| 142. | CTSZ (includes EG:1522)    | P05689 | Cathepsin Z                                                                                                        | 2, 10              | C  | P              | W     |
| 143. | CXCL1°, GROA°              | P09341 | Growth-regulated alpha protein, chemokine (C-X-C motif) ligand 1                                                   | 20                 | ES | D, G, I, Z     | W     |
| 144. | CXCL2                      | Q2KIE5 | Chemokine (C-X-C motif) ligand 2                                                                                   | 20                 | ES | I              | W     |
| 145. | CXCL3°                     | P19876 | Chemokine (C-X-C motif) ligand 3, MIP 2b                                                                           | 20                 | ES | I              | W     |
| 146. | CXCL8, IL8                 | P79255 | Chemokine (C-X-C motif) ligand 8, interleukin 8                                                                    | 20, 26             | ES | D, G, I, ST, Z | W     |
| 147. | CYB5                       | P00171 | Cytochrome b5                                                                                                      | 13                 | ER | N, O           | MF    |
| 148. | CYB5R3                     | A6H7G0 | Cytochrome b5 reductase 3, diaphorase                                                                              | 1, 4, 10, 13       | C  | O              | MF    |
| 149. | CYTX                       | P35478 | Stefin-c                                                                                                           | 10                 | C  | P              | W     |
| 150. | DDR1                       | Q0V8Q0 | Discoidin domain receptor family member 1                                                                          | 10                 | PM | G, O           | MF    |
| 151. | DDX54°                     | Q8TDD1 | DEAD box polypeptide 54, ATP-dependent RNA helicase DDX54                                                          | 3                  | N  | G              | W     |
| 152. | DHRS1                      | Q2KIS4 | Dehydrogenase/reductase (SDR family) member 1                                                                      | 10                 | C  | O              | MF    |
| 153. | DHRS3                      | O77769 | Short-chain dehydrogenase/reductase (SDR family) member 3                                                          | 1, 12              | C  | N, O           | MF    |
| 154. | DKFZp451B1115°             | Q86T70 | Putative uncharacterized protein DKFZp451B1115                                                                     | 1                  | U  | G, N           | MF    |
| 155. | DLGAP5                     | Q08DQ9 | Discs large-associated protein 5, placenta and prostate discs large                                                | 10                 | U  | D, G           | MF    |
| 156. | DMBT1°                     | Q9UGM3 | Deleted in malignant brain tumors 1, glycoprotein 340                                                              | 3                  | PM | D, I           | MF    |
| 157. | DMXL2°                     | Q8TDJ6 | DmX-like protein 2, KIAA0856                                                                                       | 10                 | C  | L, T, V        | W     |
| 158. | DNAH10°                    | Q8IVF4 | Dynein heavy chain 10 axonemal, KIAA2017                                                                           | 10                 | C  | S, O           | W     |
| 159. | DNAJB9°                    | Q9UBS3 | DnaJ homolog subfamily B member 9, Hsp40                                                                           | 5, 12              | N  | O              | W     |
| 160. | DSC2                       | P33545 | Desmocollin 2                                                                                                      | 10                 | PM | N, S           | W     |
| 161. | DVL1                       | A8KC70 | DVL1 protein                                                                                                       | 10                 | PM | G, V           | W     |
| 162. | ECHDC1                     | Q2HJD5 | Enoyl-CoA hydratase domain-containing protein 1                                                                    | 2                  | U  | N, O           | W     |
| 163. | ECM1                       | A5PJT7 | Extracellular matrix protein 1                                                                                     | 2                  | ES | A, D, G        | W     |
| 164. | EEF1A1                     | P68103 | Elongation factor 1 alpha 1, eukaryotic elongation factor 1 A-1                                                    | 1, 4, 10, 12       | C  | G, O           | MF    |
| 165. | EEF1A2                     | Q32PH8 | Elongation factor 1 alpha 2, eukaryotic elongation factor 1 A-2                                                    | 10                 | C  | G              | MF    |
| 166. | EGF                        | Q866M9 | Epidermal growth factor                                                                                            | 22                 | ES | D, G, I, M, ST | W     |
| 167. | EHD4                       | Q9EQP2 | EH domain-containing protein 4                                                                                     | 1                  | PM | L              | MF    |
| 168. | EIF4G2                     | Q95L46 | Eukaryotic translation initiation factor 4 gamma 2                                                                 | 3                  | C  | I, V           | W     |
| 169. | ELMOD2                     | Q08DZ3 | ELMO domain-containing protein 2                                                                                   | 1, 4               | U  | I, L, ST       | MF    |
| 170. | ENAH°                      | Q8N8S7 | Protein enabled homolog                                                                                            | 10                 | C  | S, O, V        | MF    |
| 171. | ENO1                       | Q9XSJ4 | Enolase alpha                                                                                                      | 2, 3, 12           | C  | A, G, I        | MF, W |
| 172. | ENPP3                      | P15396 | Ectonucleotide pyrophosphatase/phosphodiesterase family member 3, phosphodiesterase 1/nucleotide pyrophosphatase 3 | 1, 2, 6, 10, 13    | PM | I, L           | MF, W |
| 173. | EZR                        | P31976 | Ezrin, villin 2                                                                                                    | 2, 3, 4, 10        | PM | M, S           | MF, W |
| 174. | F13B                       | Q2TBQ1 | Coagulation factor XIII, polypeptide B                                                                             | 2                  | C  | A              | W     |
| 175. | F2                         | P00735 | Coagulation factor II, prothrombin                                                                                 | 2, 9, 10           | ES | A, I, P, Z     | W     |

|      |                          |        |                                                                                                    |                                  |    |             |       |
|------|--------------------------|--------|----------------------------------------------------------------------------------------------------|----------------------------------|----|-------------|-------|
| 176. | FABP3                    | P10790 | Fatty acid binding protein 3, mammary-derived growth inhibitor                                     | 2, 3, 5, 6, 7, 8, 10, 11, 12, 13 | C  | G, L, N     | MF, W |
| 177. | FABP7                    | Q09139 | Fatty acid binding protein 7                                                                       | 1, 12                            | C  | L           | MF    |
| 178. | FADK                     | Q9TTI4 | Focal adhesion kinase                                                                              | 11                               | C  | A, D, G, V  | MF    |
| 179. | FARP1                    | Q9Y4F1 | FERM, RhoGEF and pleckstrin domain-containing protein 1                                            | 10                               | C  | ST, V       | W     |
| 180. | FASN                     | Q71SP7 | Fatty acid synthase                                                                                | 1, 4, 6, 9, 10, 12               | C  | L, N        | MF    |
| 181. | FBP1                     | Q3SZB7 | Fructose-1,6-bisphosphatase 1                                                                      | 2, 10                            | C  | N           | W     |
| 182. | FBX034                   | A2VDK7 | F-box protein 34                                                                                   | 10                               | C  | U           | W     |
| 183. | FCGR2B                   | Q28110 | Low affinity IgG Fc region receptor IIb, IgG Fc receptor II, CD32                                  | 4, 5, 12                         | PM | I           | MF, W |
| 184. | FCRL5°                   | Q96RD9 | Fc receptor-like protein 5, IRTA 2, CD307                                                          | 3                                | U  | I           | W     |
| 185. | FGA                      | P02672 | Fibrinogen alpha chain                                                                             | 2, 3, 5, 12                      | ES | Z           | MF, W |
| 186. | FGB                      | P02676 | Fibrinogen beta chain                                                                              | 2, 3, 8, 9, 12                   | ES | Z           | MF, W |
| 187. | FGF1                     | P03968 | Fibroblast growth factor 1, heparin-binding growth factor 1                                        | 22                               | ES | A, G, M     | W     |
| 188. | FGF2                     | P03969 | Fibroblast growth factor 2, heparin-binding growth factor 2                                        | 22                               | ES | A, G, M     | W     |
| 189. | FGFBP1                   | Q9MZ06 | Fibroblast growth factor binding protein 1                                                         | 2, 5, 10, 12                     | ES | A, G        | W     |
| 190. | FGG                      | P12799 | Fibrinogen gamma chain                                                                             | 2, 3, 12                         | ES | I, Z        | W     |
| 191. | FN1                      | P07589 | Fibronectin                                                                                        | 2, 9, 10                         | PM | A, G, ST, V | W     |
| 192. | FOLH1                    | A6QLT8 | Folate hydrolase 1, glutamate carboxypeptidase 2                                                   | 4                                | C  | P, N        | MF    |
| 193. | FOLR1                    | P02702 | Folate receptor alpha                                                                              | 4, 5, 6, 10                      | PM | L, N        | MF, W |
| 194. | FOLR2                    | Q0VCN9 | Folate receptor beta                                                                               | 10                               | PM | L, N        | MF    |
| 195. | FUCA1                    | Q2KIM0 | Fucosidase alpha-L-1                                                                               | 2                                | C  | N           | W     |
| 196. | FYB                      | A7YWJ7 | Fyn-binding protein                                                                                | 10                               | PM | U           | W     |
| 197. | G6PC                     | Q29RU6 | Glucose 6-phosphatase                                                                              | 13                               | C  | N           | MF    |
| 198. | GALM                     | Q5EA79 | Aldose 1-epimerase, galactose mutarotase                                                           | 2                                | C  | N           | W     |
| 199. | GANAB                    | A6QNJ8 | Neutral alpha-glucosidase AB                                                                       | 2                                | C  | N           | W     |
| 200. | GAPDH (includes EG:2597) | P10096 | Glyceraldehyde-3-phosphate dehydrogenase                                                           | 3, 4                             | C  | N           | MF    |
| 201. | GC                       | Q3MHN5 | Vitamin D-binding protein, group-specific component                                                | 2, 5, 10, 12                     | ES | N           | W     |
| 202. | GDI1                     | P21856 | Rab GDP dissociation inhibitor alpha, GDP dissociation inhibitor 1                                 | 4, 10                            | C  | L, T        | MF    |
| 203. | GDI2                     | P50397 | Rab GDP dissociation inhibitor beta, GDP dissociation inhibitor 2                                  | 2, 6, 9, 10                      | C  | L, T        | MF, W |
| 204. | GFAP                     | Q28115 | Glial fibrillary acidic protein                                                                    | 1                                | C  | L, S, V     | MF    |
| 205. | GGT1°                    | P19440 | Gamma-glutamyl transpeptidase 1, gamma-glutamyltransferase 1                                       | 2, 4, 10, 13                     | C  | D, G, N     | MF, W |
| 206. | GH                       | P01246 | Somatotropin, growth hormone                                                                       | 15, 16                           | ES | D, G, M     | U     |
| 207. | GHRH                     | P63292 | Somatoliberein, growth hormone releasing factor                                                    | 15                               | ES | D, G, M     | U     |
| 208. | GLBI                     | Q58D55 | Beta galactosidase                                                                                 | 13                               | C  | L, N        | MF    |
| 209. | GLYCAM1                  | P80195 | Glycosylation dependent cell adhesion molecule 1, lactophorin, proteose peptone component 3        | 1, 2, 3, 5, 9, 10, 12            | PM | I, L        | MF, W |
| 210. | GNA11                    | P38409 | Guanine nucleotide-binding protein alpha 11, G protein subunit alpha-11                            | 6, 12                            | PM | L, ST       | MF    |
| 211. | GNA13°                   | Q14344 | Guanine nucleotide-binding protein alpha 13, G protein subunit alpha-13                            | 1, 4, 10                         | PM | L, ST       | MF    |
| 212. | GNA14                    | P38408 | Guanine nucleotide-binding protein alpha 14, G protein subunit alpha-14                            | 1, 12                            | PM | L, ST       | MF    |
| 213. | GNAI2                    | A7MBH9 | Guanine nucleotide-binding protein G(i) subunit alpha 2                                            | 1, 4                             | PM | L, ST       | MF    |
| 214. | GNAI3                    | Q3ZCA7 | Guanine nucleotide-binding protein G(k) subunit alpha                                              | 10                               | PM | L, ST       | MF    |
| 215. | GNAO1                    | P08239 | Guanine nucleotide-binding protein G(o) subunit alpha                                              | 4, 7, 10                         | PM | L, ST       | MF    |
| 216. | GNAQ                     | P50148 | Guanine nucleotide-binding protein G(q) subunit alpha                                              | 4, 10                            | PM | L, ST       | MF    |
| 217. | GNAS                     | P04896 | Guanine nucleotide-binding protein G(s) subunit alpha short isoform                                | 1, 6, 10                         | PM | L, ST       | MF    |
| 218. | GNB1                     | P62871 | Guanine nucleotide-binding protein G(I)/G(S)/G(T) subunit beta 1                                   | 1, 6, 10, 12                     | PM | L, ST       | MF    |
| 219. | GNB2                     | P11017 | Guanine nucleotide-binding protein G(I)/G(S)/G(T) subunit beta 2                                   | 1, 3, 4, 6, 7, 10, 12            | PM | L, ST       | MF    |
| 220. | GNBL21                   | P25388 | Guanine nucleotide-binding protein subunit beta 2-like 1                                           | 1                                | PM | L, ST       | MF    |
| 221. | GNG12                    | Q28024 | Guanine nucleotide-binding protein G(I)/G(S)/G(O) subunit gamma 12                                 | 4                                | PM | L, ST       | MF    |
| 222. | GOLGA7                   | Q5EA55 | Golgin subfamily A member 7, HSPC041 protein                                                       | 1                                | GA | L, P        | MF    |
| 223. | GP2                      | Q0IIA4 | Glycoprotein 2, zymogen granule membrane, pancreatic secretory granule membrane major glycoprotein | 2, 10                            | C  | I, L        | MF, W |
| 224. | GPAM                     | Q5GJ77 | Glycerol-3-phosphate acyltransferase, mitochondrial                                                | 10                               | C  | L, N        | MF    |
| 225. | GPD1                     | Q5EA88 | Glycerol-3-phosphate dehydrogenase, cytoplasmic                                                    | 6                                | C  | L, N        | MF    |
| 226. | GPRC5B                   | Q1JPD9 | G protein-coupled receptor family C group 5 member B                                               | 10                               | PM | L, ST       | W     |
| 227. | GPRC5C                   | Q2YDG0 | G protein-coupled receptor family C group 5 member C                                               | 4                                | PM | L, ST       | MF    |
| 228. | GRID1                    | Q9ULK0 | Glutamate receptor delta 1 subunit                                                                 | 3                                | PM | ST, V       | MF    |
| 229. | GRP                      | Q863C3 | Bombesin, gastrin-releasing peptide                                                                | 15                               | ES | G, V        | W     |
| 230. | GSN                      | Q3SX14 | Gelsolin, actin-depolymerizing factor                                                              | 2, 5, 6, 12                      | ES | L, N, S     | W     |

|      |                           |        |                                                                                        |                          |        |                |       |
|------|---------------------------|--------|----------------------------------------------------------------------------------------|--------------------------|--------|----------------|-------|
| 231. | HBA                       | P01966 | Hemoglobin alpha chain                                                                 | 4                        | C      | A              | MF    |
| 232. | HEBP1                     | Q148C9 | Heme binding protein 1                                                                 | 10                       | C      | L, N           | W     |
| 233. | HEXA                      | Q0V8R6 | Beta-hexosaminidase subunit alpha, N-Acetyl- $\beta$ -D-glucosaminidase                | 13                       | C      | O              | MF    |
| 234. | HIST3A                    | P68432 | H3 histone, family 3A                                                                  | 3                        | N      | O              | MF    |
| 235. | HIST1H2BI                 | Q2KII5 | Histone H2B                                                                            | 2, 10                    | U      | O              | W     |
| 236. | HIST2H2AB <sup>o</sup>    | Q8IUE6 | Histone H2A type 2-B                                                                   | 3, 10                    | N      | O              | MF    |
| 237. | HP                        | Q2TBU0 | Haptoglobin                                                                            | 2, 4, 10                 | ES     | Z              | W     |
| 238. | HPN                       | A1L5C6 | Hepsin, transmembrane serine protease                                                  | 4                        | ES     | G, I, P        | MF    |
| 239. | HPSE                      | Q9MY00 | Heparanase                                                                             | 5, 12                    | PM     | A, G, I, P     | MF, W |
| 240. | HPX                       | Q3SZV7 | Hemopexin                                                                              | 10                       | ES     | N              | W     |
| 241. | HSD17B7                   | A4FUD2 | 17-beta hydroxysteroid dehydrogenase                                                   | 10                       | PM     | L, N           | MF    |
| 242. | HSD3B7                    | Q3MHF2 | 3-beta-hydroxy-delta 5-C27-steroid oxidoreductase                                      | 4                        | C      | G, L, N        | MF    |
| 243. | HSP90AA1                  | Q76LV2 | Heat shock protein 90 kDa alpha, HSPCA                                                 | 1, 4, 10, 12             | C      | I, L, O        | MF    |
| 244. | HSP90AB1                  | Q76LV1 | Heat shock protein 90 kDa beta, HSPCB                                                  | 10                       | C      | I, L, O        | W     |
| 245. | HSP90B1                   | Q29092 | Heat shock protein 90 kDa beta member 1, endoplasmic, glucose-regulated 94 kDa protein | 3                        | ER     | I, L, O        | MF    |
| 246. | HSPA13                    | Q2TBX4 | Heat shock 70 kDa protein 13                                                           | 2                        | C      | I, L, O        | W     |
| 247. | HSPA1A                    | Q27975 | Heat shock 70 kDa protein 1A                                                           | 3, 10                    | C      | I, L, O        | MF    |
| 248. | HSPA1B                    | Q27965 | Heat shock 70 kDa protein 1B                                                           | 2                        | C      | I, L, O        | W     |
| 249. | HSPA5                     | Q0VCX2 | Heat shock 70kDa protein 5, glucose-regulated 78 kDa protein                           | 3                        | C      | I, L, O        | MF    |
| 250. | HSPA8                     | A8KC76 | Heat shock 70kDa protein 8, heat shock cognate 71 kDa protein, HSP7C                   | 2, 3, 4, 6, 7, 9, 10, 12 | C      | I, L, Z        | MF, W |
| 251. | HSPB1                     | Q3T149 | Heat shock protein beta 1, heat shock 27 kDa protein                                   | 3, 4, 10                 | C      | I, L, O        | MF    |
| 252. | IBTK <sup>o</sup>         | Q9P2D0 | Inhibitor of Bruton tyrosine kinase, KIAA1417                                          | 10                       | C      | ST             | MF    |
| 253. | IDH1                      | Q9XSG3 | Isocitrate dehydrogenase 1 (NADP <sup>+</sup> )                                        | 2, 3, 4, 6, 10, 12       | C      | L, N           | MF, W |
| 254. | IFNG                      | P07353 | Interferon gamma                                                                       | 26, 28                   | ES     | I, ST          | W     |
| 255. | IGF1                      | P07455 | Insulin-like growth factor I                                                           | 16, 22                   | C      | D, G, M, ST    | W     |
| 256. | IGF2                      | P07456 | Insulin-like growth factor II                                                          | 22                       | ES     | D, G, M, ST    | W     |
| 257. | IGFBP1                    | P24591 | Insulin-like growth factor-binding protein 1                                           | 31                       | ES     | D, G, M, ST    | U     |
| 258. | IGFBP2                    | P13384 | Insulin-like growth factor-binding protein 2                                           | 31                       | ES     | D, G, M, ST    | U     |
| 259. | IGFBP3                    | P20959 | Insulin-like growth factor-binding protein 3                                           | 31                       | ES     | D, G, M, ST    | U     |
| 260. | IGFBP4                    | Q05716 | Insulin-like growth factor-binding protein 4                                           | 31                       | ES     | D, G, M, ST    | U     |
| 261. | IGHA2 <sup>o*</sup>       | P01877 | Immunoglobulin alpha-2 chain C                                                         | 4, 5, 12                 | ES     | I              | MF    |
| 262. | IGHD <sup>o*</sup>        | P01880 | Immunoglobulin delta chain                                                             | 12                       | ES     | I              | MF    |
| 263. | IGHG1 <sup>o*</sup>       | P01857 | Immunoglobulin gamma-1 chain C region                                                  | 2, 4, 5, 10, 12          | ES     | I              | W     |
| 264. | IGHG3 <sup>o*</sup>       | P01860 | Immunoglobulin gamma-3 chain C region                                                  | 5                        | ES     | I              | MF, W |
| 265. | IGHM <sup>o*</sup>        | P01871 | Immunoglobulin mu chain C region                                                       | 1, 2, 5, 10, 12          | PM     | I              | W, MF |
| 266. | IGJ <sup>*</sup>          | Q3SYR8 | Immunoglobulin J chain, linker protein for immunoglobulin alpha and mu polypeptides    | 5, 10, 12                | ES     | I              | W     |
| 267. | IGK <sup>*</sup>          | B0JYP6 | Immunoglobulin GK protein                                                              | 2, 4, 5, 10, 12          | ES     | I              | W     |
| 268. | IGLL1 <sup>*</sup>        | A4IF10 | Immunoglobulin lambda-like chain                                                       | 2, 5, 10, 12             | PM     | I              | MF, W |
| 269. | IGLL3 <sup>*</sup>        | A2NU33 | Immunoglobulin lambda L-chain C region                                                 | 10                       | PM     | I              | W     |
| 270. | IGL $\alpha$ <sup>*</sup> | Q1RMN8 | Immunoglobulin light chain lambda locus                                                | 2, 10                    | N      | I              | MF, W |
| 271. | IL10                      | P43480 | Interleukin 10                                                                         | 26                       | ES     | G, I, ST, Z    | W     |
| 272. | IL12                      | P54349 | Interleukin 12                                                                         | 26                       | ES     | G, I, ST, Z    | W     |
| 273. | IL1A                      | P08831 | Interleukin 1alpha                                                                     | 10                       | ES     | G, I, ST, Z    | MF    |
| 274. | IL1B                      | P09428 | Interleukin 1beta                                                                      | 20, 26, 27               | ES     | G, I, ST, Z    | W     |
| 275. | IL1R2                     | Q2WFX3 | Interleukin 1 receptor 2                                                               | 25                       | PM, ES | I, ST          | W     |
| 276. | IL2                       | P05016 | Interleukin 2                                                                          | 28                       | ES     | G, I, ST       | U     |
| 277. | IL4                       | P30367 | Interleukin 4                                                                          | 39                       | ES     | I, ST          | U     |
| 278. | IL6                       | P26892 | Interleukin 6, interferon beta 2                                                       | 27                       | ES     | D, I, ST, V, Z | U     |
| 279. | IMP3                      | Q3T0M3 | U3 small nucleolar ribonucleoprotein protein IMP3                                      | 10                       | N      | O              | MF    |
| 280. | INS                       | P01317 | Insulin                                                                                | 15                       | ES     | G              | U     |
| 281. | ITIH1                     | Q0VCM5 | Inter-alpha-trypsin inhibitor heavy chain H1                                           | 2                        | ES     | L, P, S, Z     | W     |
| 282. | ITIH2                     | A5D7R6 | Inter-alpha-trypsin inhibitor heavy chain H2                                           | 5                        | ES     | L, P, S, Z     | W     |
| 283. | ITIH4                     | Q3T052 | Inter-alpha-trypsin inhibitor heavy chain H4, plasma kallikrein-sensitive glycoprotein | 2, 10                    | ES     | L, P, S, Z     | W     |
| 284. | JMJDC <sup>o</sup>        | Q15652 | Probable JmjC domain-containing histone demethylation protein 2C                       | 10                       | N      | G, ST          | W     |
| 285. | KCNMA1                    | Q28204 | Calcium-activated potassium channel subunit alpha 1                                    | 10                       | PM     | ST, T          | MF    |
| 286. | KIAA0368 <sup>o</sup>     | Q5VYK5 | Proteasome-associated protein ECM29 homolog, KIAA0368                                  | 10                       | U      | U              | W     |
| 287. | KIAA1486 <sup>o</sup>     | Q9P242 | Uncharacterized protein KIAA1486                                                       | 10                       | U      | U              | MF    |
| 288. | KIAA1586 <sup>o</sup>     | Q9HCI6 | Uncharacterized protein KIAA1586                                                       | 3                        | U      | U              | MF    |
| 289. | KIAA2026 <sup>o</sup>     | Q5HYC2 | Uncharacterized protein KIAA2026                                                       | 3                        | U      | U              | MF    |

|      |                         |                   |                                                                                                                                                                     |                                   |          |             |       |
|------|-------------------------|-------------------|---------------------------------------------------------------------------------------------------------------------------------------------------------------------|-----------------------------------|----------|-------------|-------|
| 290. | KIF22                   | A6QPL4            | Kinesin-like protein KIF22                                                                                                                                          | 10                                | N        | U           | W     |
| 291. | KNG1 (includes EG:3827) | P01044            | Kininogen 1 (includes colostrokinin–released peptide and bradykinin)                                                                                                | 2, 5, 9, 10, 12                   | ES       | A           | W     |
| 292. | KNG2                    | P01045            | Kininogen 2                                                                                                                                                         | 9                                 | ES       | A           | W     |
| 293. | KRAS <sup>o</sup>       | P01116            | GTPase KRas                                                                                                                                                         | 10                                | PM       | G, S, ST, V | MF    |
| 294. | KRR1                    | Q3B7L9            | KRR1small subunit processome component homolog                                                                                                                      | 10                                | N        | O           | MF    |
| 295. | KRT10                   | P06394            | Keratin 10                                                                                                                                                          | 3                                 | C        | L, S        | W     |
| 296. | KRT6A                   | A4FV94            | Keratin 6                                                                                                                                                           | 3                                 | PM       | L, S        | W     |
| 297. | KRT9 <sup>o</sup>       | P35527            | Keratin type I cytoskeletal 9                                                                                                                                       | 3                                 | C        | L, S        | W     |
| 298. | LALBA                   | P00711            | Lactalbumin alpha                                                                                                                                                   | 2, 4, 8, 9, 10                    | ES       | N, I        | W     |
| 299. | LAP                     | Q28880            | Lingual antimicrobial peptide                                                                                                                                       | 32                                | ES       | I           | U     |
| 300. | LAP3                    | P00727            | Leucine aminopeptidase 3                                                                                                                                            | 2                                 | C        | P           | W     |
| 301. | LBP                     | Q2TBI0            | Lipopolysaccharide-binding protein                                                                                                                                  | 2, 5, 10, 12, 26                  | PM       | I, L        | MF, W |
| 302. | LCN2                    | P80188            | Neutrophil gelatinase-associated lipocalin, lipocalin 2, NGAL                                                                                                       | 2, 5, 10, 12                      | ES       | I, Z        | W     |
| 303. | LCPI                    | Q3ZC00            | Lymphocyte cytosolic protein 1, L-plastin                                                                                                                           | 3, 5, 12                          | C        | I           | MF, W |
| 304. | LDHA                    | P19858            | Lactate dehydrogenase chain A                                                                                                                                       | 10                                | C        | L, N        | W     |
| 305. | LDHB                    | Q5E9B1            | Lactate dehydrogenase chain B                                                                                                                                       | 2                                 | C        | L, N        | W     |
| 306. | LEP                     | P50595            | Leptin                                                                                                                                                              | 19                                | ES       | G, M, ST    | U     |
| 307. | LGALS7 <sup>o</sup>     | Q6IB87            | Galectin 7, lectin galactoside-binding protein 7B                                                                                                                   | 1                                 | C, N, ES | I, ST       | MF    |
| 308. | LGB*                    | P02754            | Beta-lactoglobulin                                                                                                                                                  | 2, 5, 6, 7, 8, 9, 10              | ES       | N, I        | MF, W |
| 309. | LHRH                    | Q0VBW7            | Gonadoliberin 1, luteinizing hormone-releasing hormone, GnHRH                                                                                                       | 15                                | ES       | G, D, I, ST | U     |
| 310. | LOC686060               | Q15910;<br>Q96L73 | Similar to Histone-lysine N-methyltransferase, H3 K36 and H4 K20 specific (H3-K36-HMTase) (H4-K20-HMTase), nuclear receptor binding SET domain containing protein 1 | 2, 3, 10                          | U        | D, G, V     | MF, W |
| 311. | LOC788112               | A5PJH7            | LOC788112 protein                                                                                                                                                   | 2                                 | U        | I           | W     |
| 312. | LPL                     | P11151            | Lipoprotein lipase                                                                                                                                                  | 2, 10                             | C        | L, N        | W     |
| 313. | LPO*                    | P80025            | Lactoperoxidase                                                                                                                                                     | 2, 3, 5, 10                       | ES       | I           | W     |
| 314. | LRG1                    | Q2KIF2            | Leucine-rich alpha-2-glycoprotein 1                                                                                                                                 | 2, 10                             | ES       | Z           | W     |
| 315. | LRRC8A                  | Q08E42            | Leucine-rich repeat-containing protein 8A                                                                                                                           | 1                                 | U        | O           | MF    |
| 316. | LRRC8C <sup>o</sup>     | Q8TDW0            | Leucine-rich repeat containing protein 8C, AD158                                                                                                                    | 1                                 | C        | O           | MF    |
| 317. | LSS                     | P84466            | Lanosterol synthase                                                                                                                                                 | 10                                | C        | L, N        | MF    |
| 318. | LTF                     | P24627            | Lactotransferrin                                                                                                                                                    | 2, 3, 5, 6, 9, 10                 | ES       | G, I, N     | MF, W |
| 319. | LV107 <sup>o</sup>      | P06316            | Immunoglobulin lambda chain V-1 region BL2                                                                                                                          | 2, 5, 10                          | ES       | I           | W     |
| 320. | LYSM                    | Q6B411            | Lysozyme C, milk isozyme                                                                                                                                            | 40                                | ES       | I           | W     |
| 321. | MAL2                    | A2VE13            | Protein Mal2, T-cell differentiation protein 2                                                                                                                      | 1                                 | PM       | D, I, O     | MF    |
| 322. | MAN2A2 <sup>o</sup>     | P49641            | Alpha-mannosidase 2x, mannosidase alpha, class 2A member 2                                                                                                          | 2                                 | C        | L, N        | W     |
| 323. | MAPK                    | P46196            | Mitogen-activated protein kinase 1                                                                                                                                  | 11                                | C        | D, G, ST    | MF    |
| 324. | MARCKS                  | P12624            | Myristoylated alanine-rich C-kinase substrate                                                                                                                       | 4                                 | PM       | L, S, ST    | MF    |
| 325. | MASP1                   | Q08DW4            | Mannan-binding lectin serine peptidase 1, C4/C2 activating component of Ra-reactive factor                                                                          | 2                                 | ES       | I, P        | W     |
| 326. | MASRA2 <sup>o</sup>     | Q8NG23            | GTP binding protein Sara                                                                                                                                            | 1                                 | GA       | L, ST       | MF    |
| 327. | MBL2                    | O02659            | Mannose-binding protein C, mannose-binding lectin, collectin 1                                                                                                      | 2                                 | ES       | I           | W     |
| 328. | MDH1                    | Q3T145            | Malate dehydrogenase                                                                                                                                                | 6, 10                             | C        | L, N        | MF    |
| 329. | MESDC1                  | A6QR18            | Mesoderm development candidate 1                                                                                                                                    | 10                                | U        | U           | W     |
| 330. | METTL9                  | Q0VCJ8            | Methyltransferase-like protein 9, DORA reverse strand protein, DREV 1                                                                                               | 1                                 | C        | ST          | MF    |
| 331. | MFAP1                   | Q5EA98            | Microfibrillar-associated protein 1                                                                                                                                 | 10                                | ES       | S           | W     |
| 332. | MFGE8*                  | Q95114            | Milk fat globule-EGF factor 8 protein, lactadherin, PAS 6/7                                                                                                         | 1, 2, 3, 4, 5, 6, 7, 8, 9, 10, 13 | ES       | I, L        | MF, W |
| 333. | MGC137014               | Q2KIT0            | Hibernation-associated plasma protein HP-20-like                                                                                                                    | 10                                | C        | I           | W     |
| 334. | MGC137211               | Q2KIU3            | Putative uncharacterized protein MGC137211                                                                                                                          | 10                                | U        | I           | W     |
| 335. | MGC151921               | Q0IIA2            | Odorant-binding protein-like                                                                                                                                        | 2                                 | ES       | T           | W     |
| 336. | MLLT6 <sup>o</sup>      | P55198            | Protein AF-17                                                                                                                                                       | 10                                | N        | G           | MF    |
| 337. | MPO                     | A6QPT4            | Myeloperoxidase                                                                                                                                                     | 38                                | L        | G, I        | U     |
| 338. | MSN                     | Q2HJ49            | Moesin                                                                                                                                                              | 10                                | PM       | I           | W     |
| 339. | MSR1                    | P21758            | Macrophage scavenger receptor type I and II                                                                                                                         | 3, 12                             | PM       | I           | MF    |
| 340. | MTMR8 <sup>o</sup>      | Q96EF0            | Myotubularin-related protein 8                                                                                                                                      | 10                                | N        | V           | W     |
| 341. | MTN                     | P10950            | Melatonin synthase                                                                                                                                                  | 15                                | ES       | M, V        | U     |
| 342. | MUC1                    | Q8WML4            | Mucin 1, cell surface associated, CD227                                                                                                                             | 1, 2, 3, 10, 11, 12, 13           | PM       | I, L        | MF, W |
| 343. | MUC15                   | A7E340            | Mucin 15, cell surface associated, PAS3                                                                                                                             | 1, 2, 9, 10, 13                   | ES       | I, L        | MF, W |
| 344. | MUC16 <sup>o</sup>      | Q8WXI7            | Mucin 16                                                                                                                                                            | 10                                | ES       | I, L        | W     |
| 345. | MYEF2                   | A6QQP0            | Myelin expression factor 2                                                                                                                                          | 10                                | N        | D, G, V     | MF    |
| 346. | NAPA                    | P81125            | Alpha-soluble NSF attachment protein                                                                                                                                | 6                                 | PM       | L, T        | MF    |
| 347. | NCLN                    | Q1LZC3            | Nicalin homolog                                                                                                                                                     | 10                                | N        | D, G        | W     |
| 348. | NDRG1                   | Q3SYX0            | Protein NDRG1, N-myc downstream-regulated gene 1 protein                                                                                                            | 10                                | C        | D, G        | W     |
| 349. | NDUFV2                  | P04394            | NADH dehydrogenase (ubiquinone) flavoprotein 2, 24 kDa protein                                                                                                      | 3                                 | C        | O           | W     |
| 350. | NEB                     | Q28140            | Nebulin                                                                                                                                                             | 3                                 | C        | O           | W     |

|      |                         |        |                                                                                             |                              |    |             |       |
|------|-------------------------|--------|---------------------------------------------------------------------------------------------|------------------------------|----|-------------|-------|
| 351. | NEK3                    | A41FF6 | NEK3 protein                                                                                | 10                           | U  | D, G, ST    | W     |
| 352. | NELL2                   | A6QR11 | Protein kinase C-binding protein NEL-like 2                                                 | 2                            | ES | D, G, V     | W     |
| 353. | NFKB1                   | A7Z034 | NFKB1 protein                                                                               | 29                           | N  | G, I, ST, Z | U     |
| 354. | NME2                    | Q3T0Q4 | Nucleoside diphosphate kinase B                                                             | 10                           | C  | O           | W     |
| 355. | NP                      | P55859 | Purine nucleoside phosphorylase                                                             | 2                            | N  | O           | W     |
| 356. | NPC2                    | P79345 | Epididymal secretory protein E1, Niemann-Pick disease type C2 protein homolog               | 5, 8, 10, 12                 | ES | L, N        | MF, W |
| 357. | NSDHL                   | Q3ZBE9 | Sterol-4-alpha-carboxylate 3-dehydrogenase, NAD(P)-dependent steroid dehydrogenase-like     | 6, 10                        | C  | L, N        | MF    |
| 358. | NT5E                    | Q05927 | 5'-Nucleotidase, CD73                                                                       | 1, 6, 10, 13                 | PM | L, N        | MF    |
| 359. | NUCB1                   | Q0P569 | Nucleobindin 1                                                                              | 2, 3, 5, 10, 12              | C  | I           | W     |
| 360. | NUCB2                   | Q0IIH5 | Nucleobindin 2, DNA binding protein NEFA                                                    | 2, 5, 10, 12                 | N  | I           | W     |
| 361. | OPLAH                   | Q75WB5 | 5-Oxoprolinase, ATP-hydrolysing                                                             | 3                            | U  | L, N        | MF    |
| 362. | OR2T6°                  | Q8NHC8 | Olfactory receptor 2T6                                                                      | 1, 10                        | PM | ST          | MF    |
| 363. | ORM1, AGP               | Q3SZR3 | Alpha-1-acid glycoprotein, orosomucoid 1                                                    | 2, 8, 10                     | ES | I, Z        | W     |
| 364. | OS9                     | Q0V8D8 | Osteosarcoma amplified protein 9, endoplasmic reticulum lectin                              | 2                            | N  | B, G, P     | W     |
| 365. | OXT                     | P01175 | Oxytocin                                                                                    | 14                           | ES | G, D, ST    | W     |
| 366. | P4HA2                   | Q3SYY3 | Prolyl 4-hydroxylase, alpha polypeptide II                                                  | 3                            | U  | O           | MF    |
| 367. | P4HB                    | P05307 | Protein disulfide isomerase, prolyl 4-hydroxylase subunit beta (PDIA1)                      | 12                           | C  | I, L, O     | MF    |
| 368. | PBEF                    | C5H4R1 | Visfatin                                                                                    | 30                           | C  | G, I        | U     |
| 369. | PDCD6IP                 | Q6NUS1 | Programmed cell death 6 interacting protein                                                 | 4                            | U  | G, I, L     | MF    |
| 370. | PDE6B                   | P23439 | Rod cGMP-specific 3',5'-cyclic phosphodiesterase subunit beta                               | 10                           | PM | ST, V       | W     |
| 371. | PDE6H                   | P22571 | Retinal cone rhodopsin-sensitive cGMP 3',5'-cyclic phosphodiesterase subunit gamma          | 10                           | PM | ST, V       | W     |
| 372. | PDGFA                   | Q2KJ15 | Platelet-derived growth factor alpha                                                        | 22                           | ES | D, G, M, ST | W     |
| 373. | PDGFB                   | B1H0W5 | Platelet-derived growth factor beta                                                         | 22                           | ES | D, G, M, ST | W     |
| 374. | PDIA3                   | P38657 | Protein disulfide isomerase family A3                                                       | 6, 12                        | C  | I, O        | MF    |
| 375. | PDLIM7                  | Q3SX40 | PDZ and LIM domain protein 7                                                                | 3, 5                         | C  | B, D, G     | MF, W |
| 376. | PDXK                    | Q0II59 | Pyridoxal (pyridoxine, vitamin B6) kinase                                                   | 2, 6, 10                     | C  | G, O        | W     |
| 377. | PEBP1                   | P13696 | Phosphatidylethanolamine-binding protein 1                                                  | 10                           | C  | L, O        | W     |
| 378. | PER2°                   | O54943 | Period circadian protein homolog 2                                                          | 10                           | N  | G, O, ST    | MF    |
| 379. | PFN1                    | P02584 | Profilin 1                                                                                  | 1, 12                        | C  | G, S, V     | MF    |
| 380. | PGAM1                   | Q3SZ62 | Phosphoglycerate mutase 1                                                                   | 2                            | C  | N           | W     |
| 381. | PGD                     | Q3ZC14 | 6-Phosphogluconate dehydrogenase                                                            | 4                            | C  | N           | MF    |
| 382. | PGLS                    | Q2TBQ8 | 6-Phosphogluconolactonase                                                                   | 1                            | C  | N           | MF    |
| 383. | PGLYRP1                 | Q8SPP7 | Peptidoglycan recognition protein 1                                                         | 2, 3, 12                     | PM | I           | W, MF |
| 384. | PHB (includes EG:5245)  | Q3T165 | Prohibitin                                                                                  | 3                            | N  | G, ST       | MF    |
| 385. | PIGR                    | P81265 | Polymeric immunoglobulin receptor                                                           | 2, 3, 4, 5, 7, 8, 9, 10, 12  | PM | I, L        | MF, W |
| 386. | PKHDIL1°                | Q86W11 | Fibrocystin-L, polycystic kidney and hepatic disease 1-like protein 1                       | 10                           | PM | O           | MF    |
| 387. | PLAT                    | Q28198 | Tissue-type plasminogen activator                                                           | 37                           | ES | A, D, I, P  | U     |
| 388. | PLAU                    | Q05589 | Urokinase-type plasminogen activator                                                        | 37                           | ES | D, G, I, P  | U     |
| 389. | PLIN2                   | Q9TUM6 | Perilipin 2, adipophilin, adipose differentiation-related protein                           | 1, 3, 5, 6, 7, 9, 10, 12, 13 | PM | L           | MF, W |
| 390. | PLIN3                   | Q3SX32 | Perilipin 3, mannose-6-phosphate binding protein 1, Cargo selection protein TIP47           | 2, 10                        | PM | L           | W     |
| 391. | PLMN                    | P06868 | Plasminogen                                                                                 | 13, 37                       | ES | I           | MF    |
| 392. | PLSCR2                  | Q3ZBG9 | Phospholipid scramblase 1                                                                   | 4                            | PM | L, N        | MF    |
| 393. | PNPLA2                  | Q2K118 | Patatin-like phospholipase domain containing protein 2                                      | 1                            | C  | L, N        | MF    |
| 394. | POLDIP3                 | A7YW33 | Polymerase (DNA-directed) delta interacting protein 3                                       | 10                           | N  | O           | W     |
| 395. | POMC                    | P01190 | Pro-opiomelanocortin                                                                        | 10                           | ES | A, G, V     | W     |
| 396. | PPA1                    | P37980 | Inorganic pyrophosphatase                                                                   | 13                           | C  | B, L, N     | MF    |
| 397. | PPAP2C                  | Q2HJ61 | Lipid phosphate phosphohydrolase 2                                                          | 13                           | C  | L, N        | MF    |
| 398. | PPARG                   | O18971 | Peroxisome proliferator-activated receptor gamma, coactivator 1 beta                        | 3                            | N  | A, D, G, L  | MF, W |
| 399. | PPIA (includes EG:5478) | P62935 | Peptidylprolyl cis-trans isomerase A, cyclophilin A, rotamase                               | 1, 2, 4, 6, 10, 12           | C  | I, L, O, ST | MF, W |
| 400. | PRDX1                   | Q5E947 | Peroxiredoxin 1                                                                             | 4                            | C  | O           | MF    |
| 401. | PRKAR1A                 | P00514 | cAMP-dependent protein kinase type I-alpha regulatory subunit, kinase PRKA anchor protein 4 | 12                           | C  | D, ST       | MF    |
| 402. | PRKCB                   | P05126 | Protein kinase C beta type, diacylglycerol kinase kappa                                     | 3                            | C  | M, ST       | MF    |
| 403. | PRKDC°                  | P78527 | DNA-dependent protein kinase catalytic subunit                                              | 10                           | N  | O           | W     |
| 404. | PRKG1                   | P21136 | cGMP-dependent protein kinase 1                                                             | 10                           | C  | A, ST       | MF    |
| 405. | PRL                     | P01239 | Prolactin                                                                                   | 16                           | ES | D, G, I, ST | U     |
| 406. | PROM1°                  | O43490 | Prominin, CD133                                                                             | 4                            | PM | U           | MF    |
| 407. | PRSS8                   | Q08DU0 | Prostasin, serine protease 8                                                                | 4, 10                        | PM | P           | MF    |
| 408. | PSAP                    | A1L555 | Prosaposin, co-beta glucosidase                                                             | 2, 5, 9, 10, 12, 13          | ES | L, N, V     | MF, W |
| 409. | PSEN1                   | Q9XT97 | Presenilin 1                                                                                | 1                            | PM | P, V        | MF    |

|      |                                  |                   |                                                                                        |                 |      |                |       |
|------|----------------------------------|-------------------|----------------------------------------------------------------------------------------|-----------------|------|----------------|-------|
| 410. | PSMB1                            | Q2TBX6            | Proteasome subunit beta type 1                                                         | 2               | C    | P              | W     |
| 411. | PTGDS                            | O02853            | Prostaglandin-H2 D-isomerase                                                           | 10              | ER   | A, L, Z        | MF    |
| 412. | PTHLH                            | P58073            | Parathyroid hormone-related protein                                                    | 15              | ES   | B, D, G        | U     |
| 413. | PTX3°                            | P26022            | Pentraxin-related protein PTX3                                                         | 21              | ES   | I, Z           | U     |
| 414. | Q9XS94                           | Q9XS94            | Major fibrous sheath protein, kinase A anchor protein 4                                | 1               | C    | O, S           | MF    |
| 415. | QSOX1                            | A6QQA8            | Sulfhydryl oxidase 1, quiescin Q6                                                      | 5, 10, 12, 13   | GA   | G, L           | MF, W |
| 416. | RAB10                            | A6QLS9            | Ras-related protein Rab10                                                              | 1               | C    | L, N, ST, T    | MF    |
| 417. | RAB11A                           | Q2TA29            | Ras-related protein Rab11a                                                             | 1, 2, 4, 10     | C    | G, L, N, ST, T | MF, W |
| 418. | RAB11B                           | Q3MHP2            | Ras-related protein Rab11b                                                             | 1, 4, 7         | C    | G, L, N, ST, T | MF    |
| 419. | RAB13                            | Q58DS5            | Ras-related protein Rab13                                                              | 1               | PM   | L, N, ST, T    | MF    |
| 420. | RAB18                            | Q0IIG8            | Ras-related protein Rab18                                                              | 1, 4, 6, 7, 10  | C    | G, L, N, ST, T | MF    |
| 421. | RAB1A                            | A1L528            | Ras-related protein Rab1a                                                              | 1, 2, 4, 10     | C    | L, N, ST       | MF, W |
| 422. | RAB1B<br>(includes<br>EG:81876)  | Q2HJH2            | Ras-related protein Rab1b                                                              | 6, 7            | C    | L, N, ST, T    | MF    |
| 423. | RAB21                            | Q17R06            | Ras-related protein Rab21                                                              | 4               | C    | L, N, ST, T    | MF    |
| 424. | RAB22A                           | A5PPJ3            | Ras-related protein Rab22a                                                             | 1               | C    | L, N, ST, T    | MF    |
| 425. | RAB27B                           | Q8HZJ5            | Ras-related protein Rab27b                                                             | 1, 12           | C    | L, N, ST, T    | MF    |
| 426. | RAB2A                            | Q148J4            | Ras-related protein Rab2a                                                              | 1, 4, 10        | C    | L, N, ST, T    | MF    |
| 427. | RAB35                            | A5D7E0            | Ras-related protein Rab35                                                              | 1, 4            | C    | L, N, ST, T    | MF    |
| 428. | RAB3A                            | P11023            | Ras-related protein Rab3a                                                              | 1, 4, 12        | C    | L, N, ST, T, V | MF    |
| 429. | RAB3B                            | P10948            | Ras-related protein Rab3b                                                              | 1, 12           | C    | L, N, ST, T    | MF    |
| 430. | RAB3C                            | P10949            | Ras-related protein Rab3c                                                              | 1, 12           | C    | L, N, ST, T    | MF    |
| 431. | RAB5A                            | Q0IIG7            | Ras-related protein Rab5a                                                              | 4               | C    | L, N, ST, T    | MF    |
| 432. | RAB5B°                           | Q8IXL2            | Ras-related protein Rab5b                                                              | 1               | C    | L, N, ST, T    | MF    |
| 433. | RAB5C                            | Q58DS9            | Ras-related protein Rab5c                                                              | 1               | C    | L, N, ST, T    | MF    |
| 434. | RAB7A                            | Q3T0F5            | Ras-related protein Rab7a                                                              | 1, 2, 4, 10     | C    | L, N, ST, T    | MF, W |
| 435. | RAB8B                            | Q2HJI8            | Ras-related protein Rab8B                                                              | 4               | C    | L, N, ST, T    | MF    |
| 436. | RAC1                             | P62998            | Ras-related C3 botulinum toxin substrate 1, Rho family, small GTP binding protein Rac1 | 4, 10           | C    | A, L, S, V     | MF    |
| 437. | RALA                             | Q1JPH2            | Ras-related v-ral simian leukemia viral oncogene homolog A                             | 4               | PM   | L, S, ST, V    | MF    |
| 438. | RALB                             | A5D977            | Ras-related v-ral simian leukemia viral oncogene homolog B                             | 1               | C    | L, ST          | MF    |
| 439. | RAP1A                            | P62833            | Ras-related protein Rap-1A, GTP-binding protein smg p21A                               | 1, 4, 10, 12    | C    | L, ST          | MF    |
| 440. | RAP1B                            | P61223            | Ras-related protein Rap-1B, GTP-binding protein smg p21B                               | 1, 2, 6, 10, 12 | C    | G, L, ST       | MF, W |
| 441. | RARS2                            | Q0P5H7            | Probable arginyl-tRNA synthetase, mitochondrial                                        | 10              | M    | O              | MF    |
| 442. | RBP4                             | Q32L14            | Retinol binding protein 4                                                              | 2               | ES   | D, G, L, N, V  | W     |
| 443. | RECS1                            | Q6QRN7            | Responsive to centrifugal force and shear, PP1201 protein                              | 1               | PM   | O              | MF    |
| 444. | RHEB                             | Q56JV3            | Ras homolog enriched in brain, GTP-binding protein Rheb                                | 1               | PM   | L, ST          | MF    |
| 445. | RHOA                             | P61585            | Ras homolog gene family member A, transforming protein RhoA                            | 1, 4, 7, 10, 12 | C    | L, ST          | MF    |
| 446. | RHOC                             | Q1RMJ6            | Ras homolog gene family member C, GTP-binding protein Rho C                            | 1               | PM   | L, ST          | MF    |
| 447. | RHOF                             | Q3SZA1            | Ras homolog gene family member F, GTP-binding protein Rho F                            | 1               | C    | L, ST          | MF    |
| 448. | RHOG                             | Q1RMI2            | Ras homolog gene family member G, Rho G                                                | 4               | PM   | L, ST          | MF    |
| 449. | RIT1°                            | Q92963            | GTP-binding protein Rit1, Ras-like without CAAX protein 1                              | 1, 10, 12       | PM   | ST             | MF    |
| 450. | RNASE1                           | P61823            | Ribonuclease pancreatic, RNase family member 1                                         | 10, 13          | ES   | O              | W     |
| 451. | RNASE4                           | P15467            | Ribonuclease 4, RNase family member 4                                                  | 2, 10, 12       | ES   | O              | W     |
| 452. | RNF123°                          | Q5XPI4            | E3 ubiquitin-protein ligase RNF123                                                     | 10              | C    | P              | W     |
| 453. | RPL7A                            | Q2TBQ5            | 60S ribosomal protein L7a                                                              | 3               | U    | O              | W     |
| 454. | RUNDC3B                          | Q08E29            | RUN domain-containing protein 3B                                                       | 41              | U    | O              | U     |
| 455. | S100A11°                         | P31949            | S100 calcium-binding protein A11, calgizzarin                                          | 3               | C, N | I, Z           | MF    |
| 456. | S100A12                          | P79105            | S100 calcium-binding protein A12, calgranulin C                                        | 3, 8, 12        | C    | I, ST, Z       | MF    |
| 457. | S100A9                           | P28783            | S100 calcium-binding protein A9, calgranulin B                                         | 3, 12           | C    | I, ST, Z       | MF    |
| 458. | S100B                            | P02638            | S100 calcium-binding protein B                                                         | 10              | C    | D, G, N, V     | W     |
| 459. | S100PBP°                         | Q96BU1            | S100P binding protein Riken                                                            | 3               | U    | N              | W     |
| 460. | SAA1                             | P35541            | Serum amyloid A1 protein                                                               | 1, 3, 4, 26     | ES   | Z              | MF    |
| 461. | SAA3P°                           | P22614            | Serum amyloid A3 protein                                                               | 12              | U    | Z              | MF    |
| 462. | SAO                              | Q29437            | Primary amine oxidase, liver isozyme                                                   | 10              | ES   | O              | W     |
| 463. | SAR1A                            | Q3T0D7            | GTP-binding protein SAR1a                                                              | 7, 10           | C    | L, ST          | MF    |
| 464. | SAR1B                            | Q3T0T7            | GTP-binding protein SAR1b                                                              | 1, 6, 7, 12     | C    | L, ST          | MF    |
| 465. | SCAMP2                           | A6QR35            | Secretory carrier membrane protein 2                                                   | 1               | C    | L, T           | MF    |
| 466. | SCCPDH                           | Q3T067            | CGI 49 protein, saccharopine dehydrogenase                                             | 1, 4            | C    | N, P           | MF    |
| 467. | SCGB1D2                          | A0JNP2            | Secretoglobin family 1D member 2, lipophilin B                                         | 2, 10           | ES   | N, L           | W     |
| 468. | SCGB2A2<br>(includes<br>EG:4250) | A6QPK0            | Secretoglobin family 2A member 2                                                       | 2               | ES   | L, N, T        | W     |
| 469. | SCYL2                            | A6QLN8            | SCY1-like 2                                                                            | 3               | U    | O              | MF    |
| 470. | SDF4                             | Q3ZBZ1            | Calcium-binding 45 kDa protein, stromal cell derived factor 4                          | 2, 10           | C    | D              | W     |
| 471. | SELENBP1°                        | Q13228            | Selenium-binding protein 1                                                             | 10              | N    | N, T           | MF    |
| 472. | SEP15                            | A8YXY3            | 15 kDa selenoprotein                                                                   | 10              | ER   | O              | MF    |
| 473. | SERPINA 3-7                      | A2I7N3/<br>Q5J801 | Serpin peptidase inhibitor clade A member 7, endopin 2b                                | 2, 5, 10, 12    | ES   | P              | W     |
| 474. | SERPINA1*                        | P34955            | Alpha-1-antitrypsin, serpin peptidase inhibitor clade A member 1                       | 2, 3, 8, 10, 12 | ES   | I, N, P, Z     | W     |



## Supplementary Material (ESI) for Molecular BioSystems

This journal is (c) The Royal Society of Chemistry, 2010

|      |           |        |                                                                                                                  |                    |          |                   |       |
|------|-----------|--------|------------------------------------------------------------------------------------------------------------------|--------------------|----------|-------------------|-------|
| 475. | SERPINA3* | Q9TTE1 | Alpha-1-antichymotrypsin, serpin peptidase inhibitor, clade A member 3, endopin 1a                               | 2, 5, 10, 12       | ES       | I, N, P, Z        | MF, W |
| 476. | SERPINA4° | P29622 | Serpin peptidase inhibitor clade A member 4, kallistatin                                                         | 10, 12             | ES       | P                 | W     |
| 477. | SERPINA5  | Q9N2I2 | Serpin peptidase inhibitor clade A member 5, plasma serine protease inhibitor                                    | 10, 12             | ES       | P                 | MF, W |
| 478. | SERPINC1  | P41361 | Serpin peptidase inhibitor clade C member 1, antithrombin III                                                    | 2, 5, 10, 12       | ES       | P                 | W     |
| 479. | SERPIND1  | A6QPP2 | Serpin peptidase inhibitor clade D member 1                                                                      | 2                  | ES       | P                 | W     |
| 480. | SERPING1° | P05155 | Serpin peptidase inhibitor clade G member 1, plasma protease C1 inhibitor                                        | 2, 5, 9, 10, 12    | ES       | I, N, P           | W     |
| 481. | SFN       | Q0VC36 | 14-3-3 sigma, stratifin                                                                                          | 5                  | ES, N, C | ST                | W     |
| 482. | SFP4      | P81019 | Seminal plasma protein BSP-30 kDa                                                                                | 4                  | ES       | O                 | MF    |
| 483. | SFT2D2    | A6QPB4 | SFT2D2 protein                                                                                                   | 10                 | PM       | L                 | MF    |
| 484. | SGK1      | A7MB74 | Serine/threonine-protein kinase Sgk1                                                                             | 10                 | C        | O, ST             | W     |
| 485. | SGLT1     | Q8MKB7 | Sodium/glucose cotransporter                                                                                     | 1                  | PM       | T                 | MF    |
| 486. | SIL1      | Q32KV6 | Nucleotide exchange factor SIL1, endoplasmic reticulum chaperone homolog                                         | 2, 10              | C        | T                 | W     |
| 487. | SIRPA     | O46631 | Tyrosine-protein phosphatase non-receptor type substrate 1                                                       | 10                 | PM       | I, V              | W     |
| 488. | SLC16A1   | Q3MHW6 | Solute carrier family 16 (monocarboxylate transporter) member 1                                                  | 4                  | PM       | L, T              | MF    |
| 489. | SLC1A1    | A7MB31 | Solute carrier family 1 (neuronal/epithelial high affinity glutamate/excitatory amino acid transporter) member 1 | 1, 4, 12           | PM       | L, T              | MF    |
| 490. | SLC27A6   | A6QQD5 | Acyl-CoA synthetase long-chain family member 6                                                                   | 4                  | C        | L, T              | MF    |
| 491. | SLC28A1°  | O00337 | Solute carrier family 28 (sodium-nucleoside cotransporter) member 1                                              | 4                  | PM       | L, T              | MF    |
| 492. | SLC28A3   | A4UQU5 | Solute carrier family 28 (concentrative sodium-nucleoside cotransporter) member 3                                | 10                 | PM       | L, T              | MF    |
| 493. | SLC29A1   | Q3ZC83 | Solute carrier family 29 (nucleoside transporter) member 1                                                       | 10                 | PM       | L, T              | MF    |
| 494. | SLC2A3    | P58352 | Solute carrier family 2 (facilitated glucose transporter) member 3                                               | 4                  | PM       | L, T              | MF    |
| 495. | SLC34A2   | Q27960 | Solute carrier family 34 (sodium-dependent phosphate transport protein 2B) member 2                              | 2, 3, 9, 10, 12    | PM       | L, T              | MF, W |
| 496. | SLC3A2    | Q5EA54 | Solute carrier family 3 (activators of dibasic and neutral amino acid transport) member 2                        | 4                  | PM       | L, T              | MF    |
| 497. | SLC5A1    | A5HNF2 | Solute carrier family 5 member 1                                                                                 | 4, 10, 12          | PM       | L, T              | MF    |
| 498. | SLC6A14   | Q9UN76 | Solute carrier family 6 (sodium and chloride-dependent neutral and basic amino acid transporter) member 14       | 4                  | PM       | L, T              | MF    |
| 499. | SLC6A8    | O18875 | Solute carrier family 6 (sodium and chloride-dependent creatine transporter) member 8                            | 1, 12              | C        | L, T              | MF    |
| 500. | SLC8A3    | P57103 | Sodium/calcium exchanger 3                                                                                       | 10                 | PM       | L, T              | W     |
| 501. | SNAP23    | Q2T9M8 | Synaptosomal-associated 23k Da protein                                                                           | 1, 10              | PM       | L, V              | MF    |
| 502. | SND1      | Q863B3 | Staphylococcal nuclease/tudor domain-containing protein 1                                                        | 1                  | N        | I, ST             | MF    |
| 503. | SORL1°    | Q92673 | Sortilin-related receptor                                                                                        | 10                 | PM       | L                 | W     |
| 504. | SOX18     | Q0VC26 | SRY (Sex determining region Y)-box 18                                                                            | 10                 | N        | A, D              | MF    |
| 505. | SPEG      | Q2HJ82 | SPEG protein                                                                                                     | 10                 | U        | A, G              | W     |
| 506. | SPP1      | P31096 | Osteopontin, secreted phosphoprotein 1                                                                           | 2, 5, 9, 10, 12    | ES       | B, I, ST          | W     |
| 507. | SPPL2A°   | Q8TCT8 | Signal peptide peptidase-like 2A                                                                                 | 4                  | ES       | P                 | MF    |
| 508. | SRRM2     | A7E374 | SRRM2 protein                                                                                                    | 10                 | N        | O                 | W     |
| 509. | SSR1      | A6QLP7 | Translocon associated protein alpha, signal sequence receptor subunit alpha                                      | 1, 12              | C        | L, N, T           | MF    |
| 510. | SST       | P26917 | Somatostatin                                                                                                     | 15                 | ES       | D, G, ST          | U     |
| 511. | ST8SIA5   | O15466 | Alpha-2,8-sialyltransferase 8E                                                                                   | 10                 | GA       | D, V              | MF    |
| 512. | STAG2°    | Q8N3U4 | Cohesin subunit SA-2                                                                                             | 10                 | N        | D, G              | W     |
| 513. | STAT5B    | Q9TUM3 | Signal transducer and activator of transcription 5B                                                              | 1, 29              | N        | A, D, G, ST       | MF    |
| 514. | STC1      | Q9N0T1 | Stanniocalcin 1                                                                                                  | 18                 | ES       | B, G              | U     |
| 515. | STOM      | A8E4P3 | Stomatin                                                                                                         | 1, 4               | PM       | L                 | MF    |
| 516. | STX3      | A6QLH3 | Syntaxin 3                                                                                                       | 1, 4, 10           | PM       | L, T, V           | MF    |
| 517. | STXBP2    | Q2NL10 | Syntaxin binding protein 2                                                                                       | 4                  | PM       | I, L              | MF    |
| 518. | SYNE1     | A6QQJ0 | Spectrin repeat containing nuclear envelope protein 1                                                            | 2                  | N        | S                 | W     |
| 519. | TCN1*     | P20061 | Transcobalamin I, vitamin B12-binding protein, haptocorrin                                                       | 17                 | C        | I, N              | U     |
| 520. | TCP1      | Q32L40 | T-complex protein 1 subunit alpha                                                                                | 6                  | C        | I                 | MF    |
| 521. | TF        | Q29443 | Transferrin                                                                                                      | 2, 3, 8, 9, 10, 12 | ES       | I, N              | W     |
| 522. | TGFA      | Q7M304 | Transforming growth factor alpha                                                                                 | 26                 | ES       | D, G, M, ST       | W     |
| 523. | TGFB1     | P18341 | Transforming growth factor beta 1                                                                                | 22, 26             | ES       | B, D, G, I, ST, Z | W     |
| 524. | TGFB2     | P21214 | Transforming growth factor beta 2                                                                                | 22, 26             | ES       | G, I, ST          | W     |
| 525. | TKT       | A5PJ79 | Transketolase                                                                                                    | 2, 10              | C        | G, N              | W     |
| 526. | TLR2      | Q95LA9 | Toll-like receptor 2                                                                                             | 1, 4, 10, 12       | PM       | I                 | MF    |
| 527. | TLR4      | Q9GL65 | Toll-like receptor 4                                                                                             | 1, 4, 12           | PM       | I                 | MF    |
| 528. | TM4SF18   | Q3T110 | Transmembrane 4 L6 family member 18                                                                              | 1                  | U        | O                 | MF    |
| 529. | TNFA      | Q06599 | Tumor necrosis factor alpha                                                                                      | 20, 27             | PM       | D, G, I, Z        | W     |
| 530. | TNFRSF6B  | A6QPW7 | Tumor necrosis factor receptor superfamily member 6B                                                             | 2                  | PM       | ST                | W     |
| 531. | TOX4      | Q0P5K4 | TOX high mobility group box family member 4                                                                      | 10                 | N        | O                 | W     |

|      |                                              |        |                                                                                            |                                 |    |            |       |
|------|----------------------------------------------|--------|--------------------------------------------------------------------------------------------|---------------------------------|----|------------|-------|
| 532. | TPP1                                         | Q0V8B6 | Tripeptidyl peptidase I                                                                    | 2                               | C  | P          | W     |
| 533. | TPT1                                         | Q5E984 | Translationally-controlled tumor protein                                                   | 6                               | C  | L, N, S    | MF    |
| 534. | TRIM11                                       | A0JN74 | Tripartite motif-containing protein 11                                                     | 10                              | C  | O          | MF    |
| 535. | TRIM68 <sup>o</sup>                          | Q6AZZ1 | E3 ubiquitin-protein ligase TRIM68, tripartite motif-containing protein 68                 | 1                               | C  | O          | MF    |
| 536. | TRIP12                                       | Q0P5M6 | TRIP12 protein                                                                             | 10                              | C  | P          | W     |
| 537. | TRY                                          | P00760 | Cationic trypsin, alpha trypsin 1                                                          | 2                               | ES | P          | W     |
| 538. | TSHB                                         | P01223 | Thyroid stimulating hormone subunit beta                                                   | 15                              | ES | D, G, ST   | U     |
| 539. | TTN                                          | Q8WZ42 | Titin, connectin                                                                           | 10                              | C  | L, S, ST   | MF    |
| 540. | TTR                                          | O46375 | Transthyretin                                                                              | 2, 5, 8, 10, 12                 | ES | G, N, T, V | MF, W |
| 541. | TTYH1                                        | Q2KJ98 | Protein tweety homolog 1                                                                   | 4                               | PM | T          | MF    |
| 542. | TUBA3C                                       | Q13748 | Tubulin alpha 3C/D chain, tubulin alpha 2 chain                                            | 4                               | C  | S          | MF    |
| 543. | TUBB2C                                       | Q3MHM5 | Tubulin beta 2C chain                                                                      | 3                               | C  | S          | MF    |
| 544. | TULP1                                        | O00294 | Tubby-related protein 1                                                                    | 10                              | C  | V          | MF    |
| 545. | UBB                                          | P62990 | Ubiquitin B, ribosomal protein S27a                                                        | 4, 10                           | C  | P          | MF    |
| 546. | UBL3 <sup>o</sup>                            | O95164 | Ubiquitin-like protein 3, membrane-anchored ubiquitin-fold protein                         | 1                               | ES | P          | W     |
| 547. | UGP2                                         | Q07130 | UDP-glucose-1-phosphate uridylyltransferase, UDP-glucose pyrophosphorylase                 | 2                               | C  | N, O       | MF, W |
| 548. | UMOD                                         | P48733 | Uromodulin                                                                                 | 1                               | ES | I, L, N    | MF    |
| 549. | VAMP2                                        | P63026 | Vesicle-associated membrane protein 2, synaptobrevin 2, cellubrevin                        | 1                               | PM | L, N       | MF    |
| 550. | VAMP8                                        | Q3T0Y8 | Vesicle-associated membrane protein 8, endobrevin                                          | 1, 10                           | PM | L, N       | MF    |
| 551. | VAT1 <sup>o</sup>                            | Q99536 | Synaptic vesicle membrane protein VAT-1 homolog, vesicle amine transport protein 1 homolog | 1, 4, 10                        | PM | L, N       | MF    |
| 552. | VCP                                          | Q3ZBT1 | Transitional endoplasmic reticulum ATPase, TER ATPase                                      | 6                               | C  | L, N       | MF    |
| 553. | VDAC1                                        | P45879 | Voltage-dependent anion-selective channel protein 1                                        | 3                               | C  | T, V       | MF    |
| 554. | VIM                                          | P48616 | Vimentin                                                                                   | 3                               | C  | L, S       | MF    |
| 555. | VPS28                                        | Q3T178 | Vacuolar protein sorting-associated protein 28                                             | 4                               | PM | P, T       | MF    |
| 556. | VPS4B                                        | Q0VD48 | Vacuolar protein sorting factor 4 B                                                        | 4                               | PM | G, T       | MF    |
| 557. | WARS                                         | P17248 | Tryptophanyl-tRNA synthetase                                                               | 6                               | C  | S, ST      | MF    |
| 558. | WC1                                          | B6UM01 | WC1                                                                                        | 3                               | PM | I, ST      | U     |
| 559. | XDH                                          | P80457 | Xanthine dehydrogenase/oxidase                                                             | 1, 2, 3, 5, 6, 7, 9, 10, 11, 13 | C  | I, L       | MF, W |
| 560. | YKT6                                         | Q3T000 | Synaptobrevin homolog YKT6, YKT6 v-SNARE homolog                                           | 1, 2, 4                         | C  | L, N, T    | MF, W |
| 561. | YWHAB                                        | P68250 | 14-3-3 protein gamma beta/alpha, protein kinase C inhibitor                                | 1, 12                           | C  | ST         | MF    |
| 562. | YWHAE                                        | P62261 | 14-3-3 protein epsilon, protein kinase C inhibitor                                         | 12                              | C  | ST         | W     |
| 563. | YWHAG                                        | P68252 | 14-3-3 protein gamma, protein kinase C inhibitor                                           | 1, 12                           | C  | ST         | MF    |
| 564. | YWHAZ                                        | P63103 | 14-3-3 protein gamma zeta/delta, protein kinase C inhibitor                                | 3, 12                           | C  | ST         | MF    |
| 565. | ZC3H13                                       | Q0VCM8 | Zinc finger CCCH-type containing 13, similar to KIAA0853                                   | 3                               | U  | O          | W     |
| 566. | ZMAT1 <sup>o</sup>                           | Q5H9K5 | Zinc finger matrin-type protein 1                                                          | 10                              | N  | O          | W     |
| 567. | ZMPSTE24 <sup>o</sup>                        | O75844 | CAAX prenyl protease 1 homolog, zinc metallopeptidase STE24 homolog                        | 3                               | N  | P          | W     |
| 568. | ZNF297 <sup>o</sup> ,<br>ZBTB22 <sup>o</sup> | O15209 | Zinc finger and BTB domain-containing protein 22                                           | 10                              | N  | O          | W     |
| 569. | ZNF479 <sup>o</sup>                          | Q96JC4 | Zinc finger protein 479                                                                    | 3                               | C  | O          | W     |
| 570. | ZNF641 <sup>o</sup>                          | Q96N77 | Zinc finger protein 641                                                                    | 10                              | N  | O          | W     |
| 571. | ZNF668                                       | Q2TA17 | Zinc finger protein 668                                                                    | 3                               | C  | O          | W     |
| 572. | ZNF822,<br>ATMIN                             | O43313 | ATM interactor, ATM/ATR-substrate CHK2-interacting zinc finger protein                     | 10                              | N  | O          | MF    |
| 573. | ZO1                                          | Q95M47 | Tight junction protein 1                                                                   | 1, 12                           | C  | S          | MF    |

## References

- [1] Reinhardt TA, Lippolis JD. Bovine milk fat globule membrane proteome. *J Dairy Res.* 2006; 73(4):406-16.
- [2] D'Amato A, Bachi A, Fasoli E, Boschetti E, Peltre G, Sénéchal H, Righetti PG. In-depth exploration of cow's W proteome via combinatorial peptide ligand libraries. *J Proteome Res* 2009; 8(8): 3925-36.
- [3] Smolenski G, Haines S, Kwan FY, Bond J, Farr V, Davis SR, Stelwagen K, Wheeler TT. Characterisation of host defence proteins in milk using a proteomic approach. *J Proteome Res.* 2007; 6:207–15.
- [4] Reinhardt TA, Lippolis JD. Developmental changes in the milk fat globule membrane proteome during the transition from colostrum to milk. *J Dairy Sci* 2008; 91: 2307–18.
- [5] Fong YP, Norris CS, Palmano KP. Fractionation of bovine W proteins and characterisation by proteomic techniques. *Int Dairy J* 2008; 18: 23–46.
- [6] Bianchi L, Puglia M, Landi C, Matteoni S, Perini D, Armini A, Verani M, Trombetta C, Soldani P, Roncada P, Greppi G, Pallini V, Bini L. Solubilization methods and reference 2-DE map of cow milk fat globules. *J Proteomics* 2009; 72(5): 853-64.
- [7] Vanderghem C, Blecker C, Danthine S, Deroanne C, Haubruge E, Guillonnet F. Proteome analysis of bovine milk fat globule: enhancement of membrane purification. *Int Dairy J* 2008; 18: 885–93.
- [8] Boehmer JL, Bannerman DD, Shefcheck K, Ward JL. Proteomic analysis of differentially expressed proteins in bovine milk during experimentally induced *Escherichia coli* mastitis. *J Dairy Sci* 2008; 1(11): 4206-18.
- [9] Molle D, Jardin J, Piot M, Pasco M, Leonil J, Gagnaire V. Comparison of electrospray and matrix-assisted laser desorption ionization on the same hybrid quadrupole time-of-flight tandem mass spectrometer. Application bidimensional liquid chromatography of proteins from bovine milk fraction. *J Chromatogr A.* 2009; 1216(12):2424–32.
- [10] Affolter M, Grass L, Vanrobaeys F, Casado B, Kussmann M. Qualitative and quantitative profiling of the bovine milk fat globule membrane proteome. *J Proteomics.* [doi:10.1016/j.jprot.2009.11.008](https://doi.org/10.1016/j.jprot.2009.11.008)
- [11] Spitsberg VL. Invited review: Bovine milk fat globule membrane as a potential nutraceutical. *J Dairy Sci* 2005;88(7): 2289-94.
- [12] Gagnaire V, Jardin J, Jan G, Lortal S. Invited review: Proteomics of milk and bacteria used in fermented dairy products: from qualitative to quantitative advances. *J Dairy Sci* 2009; 92(3):811-25.
- [13] Mather IH. A review and proposed nomenclature for major proteins of the milk-fat globule membrane. *J Dairy Sci.* 2000; 83:203–47.
- [14] Prakash BS, Paul V, Kliem H, Kulozik U, Meyer HH. Determination of oxytocin in milk of cows administered oxytocin. *Anal Chim Acta.* 2009 Mar 16;636(1):111-5.
- [15] Jouana PN, Pouliotb Y, Gauthiera SF, Laforeste JP. Hormones in bovine milk and milk products: A survey. *Int Dairy J* 2006; 16(11):1408-14.
- [16] McGrath MF, Bogosian G, Fabellar AC, Staub RL, Vicini JL, Widger LA. Measurement of bovine somatotropin (bST) and insulin-like growth factor-1 (IGF-1) in bovine milk using an electrochemiluminescent assay. *J Agric Food Chem.* 2008;56(16):7044-8.
- [17] Fedosov SN, Petersen TE, Nexø E. Binding of cobalamin and cobinamide to from bovine milk. *Biochemistry.* 1995;34(49):16082-7.
- [18] Tremblay G, Bernier-Dodier P, Delbecchi L, Wagner GF, Talbot BG, Lacasse P. Local control of mammary involution: is stanniocalcin-1 involved? *J Dairy Sci.* 2009;92(5):1998-2006.
- [19] Parola R, Macchi E, Fracchia D, Sabbioni A, Avanzi D, Motta M, Accorsero P, Baratta M. Comparison between plasma and milk levels of leptin during pregnancy and lactation in cow, a relationship with beta-lactoglobulin. *J Anim Physiol Anim Nutr (Berl).* 2007;91(5-6):240-6.
- [20] Rainard P, Fromageau A, Cunha P, Gilbert FB. *Staphylococcus aureus* lipoteichoic acid triggers inflammation in the lactating bovine mammary gland. *Vet Res* 2008;39(5):52.
- [21] Lutzow YC, Donaldson L, Gray CP, Vuocolo T, Pearson RD, Reverter A, Byrne KA, Sheehy PA, Windon R, Tellam RL. Identification of immune genes and proteins involved in the response of bovine mammary tissue to *Staphylococcus aureus* infection. *BMC Vet Res.* 2008;4:18.
- [22] Gauthier SF, Pouliot Y, Maubois JL. Growth factors from bovine milk and colostrum: composition, extraction and biological activities. *Lait* 2006; 86:99-125.
- [23] Shing Y, Klagsbrun M. Purification and characterization of a bovine colostrum-derived growth factor. *Mol Endocrinol.* 1987;1(5):335-8.
- [24] Talhouk RS, Neiswander RL, Schanbacher FL. Developmental regulation and partial characterization of growth factors in the bovine mammary gland. *J Reprod Fertil.* 1996;106(2):221-30.
- [25] Hagiwara K, Kitajima K, Yamanaka H, Kirisawa R, Iwai H. Development of a sandwich ELISA assay for measuring bovine soluble type II IL-1 receptor (IL1R2) concentration in serum and milk. *Cytokine.* 2005;32(3-4):132-6.
- [26] Bannerman DD, Chockalingam A, Paape MJ, Hope JC. The bovine innate immune response during experimentally-induced *Pseudomonas aeruginosa* mastitis. *Vet Immunol Immunopathol.* 2005;107(3-4):201-15.

- [27] Dernfalk J, Persson Waller K, Johannisson A. The xMAP technique can be used for detection of the inflammatory cytokines IL-1 $\beta$ , IL-6 and TNF- $\alpha$  in bovine samples. *Vet Immunol Immunopathol.* 2007;118(1-2):40-9.
- [28] De UK, Mukherjee R. Expression of cytokines and respiratory burst activity of milk cells in response to *Azadirachta indica* during bovine mastitis. *Trop Anim Health Prod.* 2009;41(2):189-97.
- [29] Boutet P, Boulanger D, Gillet L, Vanderplasschen A, Closset R, Bureau F, Lekeux P. Delayed neutrophil apoptosis in bovine subclinical mastitis. *J Dairy Sci.* 2004;87(12):4104-14.
- [30] Yonezawa T, Haga S, Kobayashi Y, Takahashi T, Obara Y. Visfatin is present in bovine mammary epithelial cells, lactating mammary gland and milk, and its expression is regulated by cAMP pathway. *FEBS Lett.* 2002;513(2-3):6635-43.
- [31] Rajaram S, Baylink DJ, Mohan S. Insulin-like growth factor-binding proteins in serum and other biological fluids: regulation and functions. *Endocr Rev.* 1997;18(6):801-31.
- [32] Isobe N, Nakamura J, Nakano H, Yoshimura Y. Existence of functional lingual antimicrobial peptide in bovine milk. *J Dairy Sci.* 2009;92(6):2691-5.
- [33] Nishita T, Tanaka Y, Wada Y, Murakami M, Kasuya T, Ichihara N, Matsui K, Asari M. Measurement of carbonic anhydrase isozyme VI (CA-VI) in bovine sera, saliva, milk and tissues. *Vet Res Commun.* 2007;31(1):83-92.
- [34] Hayakawa K, Yoshikawa K, Oizumi J, Yamauchi K. Improved high-performance liquid chromatographic determination of biotinidase activity with biotinyl-6-aminoquinoline as substrate. *J Chromatogr.* 1993;617(1):29-35.
- [35] Matsuoka Y, Serizawa A, Yoshioka T, Yamamura J, Morita Y, Kawakami H, Toba Y, Takada Y, Kumegawa M. Cystatin C in milk basic protein (MBP) and its inhibitory effect on bone resorption in vitro. *Biosci Biotechnol Biochem.* 2002;66(12):2531-6.
- [36] Gonen E, Nedvetzki S, Naor D, Shpigel NY. CD44 is highly expressed on milk neutrophils in bovine mastitis and plays a role in their adhesion to matrix and mammary epithelium. *Vet Res.* 2008;39(3):29.
- [37] Ismail B, Choi LH, Were LM, Nielsen SS. Activity and nature of plasminogen activators associated with the casein micelle. *J Dairy Sci.* 2006;89(9):3285-95.
- [38] Cooray R. Use of bovine myeloperoxidase as an indicator of mastitis in dairy cattle. *Vet Microbiol.* 1994;42(4):317-26.
- [39] Rodriguez-Sallaberry C, Caldari-Torres C, Collante W, Staples CR, Badinga L. Plasma prostaglandin and cytokine concentrations in periparturient Holstein cows fed diets enriched in saturated or trans fatty acids. *J Dairy Sci.* 2007;90(12):5446-52.
- [40] Shahani KM, Herper WJ, Jensen RG, Parry RM Jr, Zittle CA. Enzymes in bovine milk: a review. *J Dairy Sci.* 1973;56(5):531-43.

Papers in the field with redundant protein entries

- [41] Farrell HM Jr, Jimenez-Flores R, Bleck GT, Brown EM, Butler JE, Creamer LK, Hicks CL, Hollar CM, Ng-Kwai-Hang KF, Swaisgood HE. Nomenclature of the proteins of cows' milk--sixth revision. *J Dairy Sci.* 2004; 87(6): 1641-74.
- [42] Goldfarb MF, Savadove MS, Inman JA. Two-dimensional electrophoretic analysis of human milk proteins. *Electrophoresis.* 1989; 10: 67-70.
- [43] Galvani M, Hamdan M, Righetti PG. Two-dimensional gel electrophoresis/matrix-assisted laser desorption/ionisation mass spectrometry of commercial bovine milk. *Rapid Commun Mass Spectrom.* 2001; 15: 258-64.
- [44] Yamada M, Murakami K, Wallingford JC, Yuki Y. Identification of low-abundance proteins of bovine colostrum and mature milk using two-dimensional electrophoresis followed by microsequencing and mass spectrometry. *Electrophoresis.* 2002; 23: 1153-60.
- [45] Hogarth CJ, Fitzpatrick JL, Nolan AM, Young FJ, Pitt A, Eckersall PD. Differential protein composition of bovine W: a comparison of W from healthy animals and from those with clinical mastitis. *Proteomics.* 2004; 4(7): 2094-100.
- [46] Holland JW, Deeth HC, Alewood PF. Resolution and characterisation of multiple isoforms of bovine kappa-casein by 2-DE following a reversible cysteine-tagging enrichment strategy. *Proteomics.* 2006; 6: 3087-95.
- [47] Zuo X, Speicher DW. Comprehensive analysis of complex proteomes using microscale solution isoelectrofocusing prior to narrow pH range two-dimensional electrophoresis. *Proteomics.* 2002;2(1):58-68.
- [48] Fong BY, Norris CS, MacGibbon AKH. Protein and lipid composition of bovine milk-fat-globule membrane. *Int Dairy J.* 2007; 17:275-88.
- [49] D'Auria E, Agostoni C, Giovannini M, Riva E, Zetterstrom R, Fortin R, Grepp GF, Bonizzi L, Roncada P. Proteomic evaluation of milk from different mammalian species as a substitute for breast milk. *Acta Paediatr.* 2005; 94: 1708-13.
