# Supplementary figures and images for: The bovine milk proteome: cherishing, nourishing and fostering molecular complexity. An interactomics and functional overview
Source: Royal Society of Chemistry journal article supplement (doi:10.1039/c0mb00027b), 2010-09-29

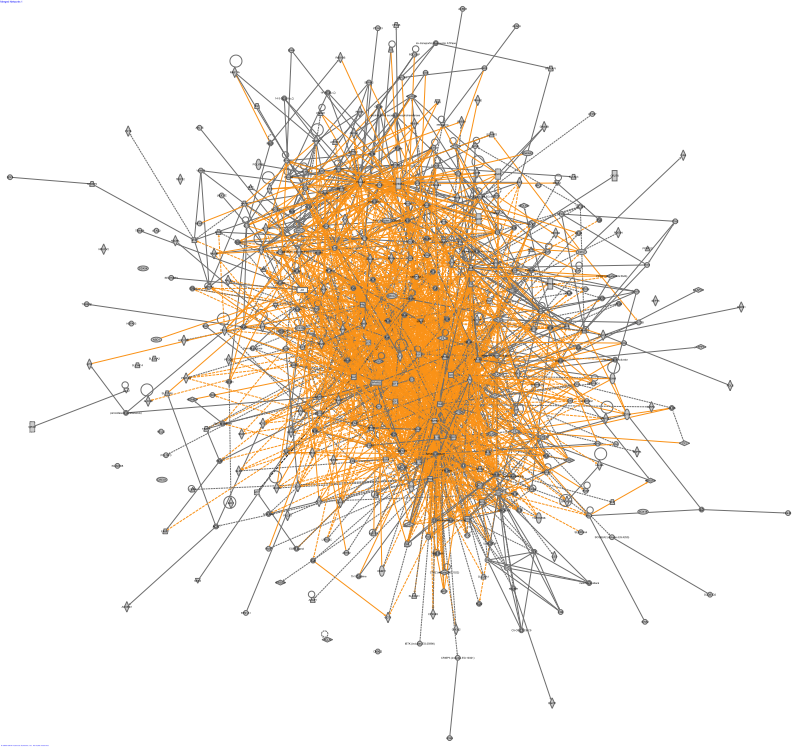

Supplement: c0mb00027b.pdf [file c0mb00027b.pdf]
